1 **Z-Flipon Variants reveal the many roles of Z-DNA and Z-RNA in health and disease**

2

3 Dmitry Umerenkov<sup>1+</sup>, Alan Herbert<sup>2,3,4\*+</sup>, Dmitrii Konovalov<sup>2</sup>, Anna Danilova<sup>2</sup>, Nazar  
4 Beknazarov<sup>2</sup>, Vladimir Kokh<sup>1</sup>, Aleksandr Fedorov<sup>2</sup> and Maria Poptsova<sup>2,4</sup>

5

6 <sup>1</sup>Sber Artificial Intelligence Lab, Moscow, Russia

7 <sup>2</sup>Laboratory of Bioinformatics, Faculty of Computer Science, HSE University, Moscow,

8 Russia

9 <sup>3</sup>InsideOutBio, Charlestown, MA, USA

10 + Co-first authors

11

12 <sup>4</sup>Corresponding authors

13 Alan Herbert ([alan.herbert@insideoutbio.com](mailto:alan.herbert@insideoutbio.com))

14 Maria Poptsova ([mpoptsova@hse.edu](mailto:mpoptsova@hse.edu))

15 \*Communicating author

16

17 **Abstract**

18

19 Identifying roles for Z-flipons remains challenging given their dynamic nature. Here we  
20 perform genome-wide interrogation with the DNABERT transformer algorithm trained on  
21 experimentally identified Z-DNA sequences. We show Z-flipons are enriched in promoters  
22 and telomeres and overlap quantitative trait loci for RNA expression, RNA editing, splicing  
23 and disease associated variants. Surprisingly, many effects are mediated through Z-RNA  
24 formation. We describe Z-RNA motifs present in SCARF2, SMAD1 and CACNA1  
25 transcripts and others in non-coding RNAs. We also provide evidence for another Z-RNA  
26 motif that likely enables an adaptive anti-viral intracellular defense through alternative  
27 splicing of KRAB domain zinc finger proteins. An analysis of OMIM and gnomAD  
28 predicted loss-of-function datasets reveals an overlap of predicted and experimentally  
29 validated Z-flipons with disease causing variants in 8.6% and 2.9% of mendelian disease  
30 genes respectively, with frameshift variants present in 22% of cases. The work greatly  
31 extends the number of phenotypes mapped to Z-flipon variants.

32

## 33 **Introduction**

34 The discovery of the Z $\alpha$  domain in the p150 isoform of the double-stranded RNA (dsRNA)  
35 editing enzyme ADAR1 (encoded by ADAR), along with genetic studies in both humans  
36 <sup>1</sup> and mice <sup>2-4</sup> has unambiguously confirmed a biological role for both Z-DNA and Z-RNA  
37 (collectively called ZNA) in the regulation of interferon responses, self/nonself transcript  
38 discrimination <sup>5</sup> and the necroptosis cell death pathways <sup>6</sup>. The covalent modifications of  
39 adenosine-to-inosine (A $\rightarrow$ I) RNA editing performed by ADAR1 and the MLKL  
40 phosphorylation activated by ZBP1 (ZNA binding protein 1) enabled tracking of transient  
41 ZNA formation in cells. Here we use a genome-wide approach to discover additional  
42 phenotypes that are regulated by Z-flipons, sequences that can form ZNAs under  
43 physiological conditions. Our approach is computational and based on a novel and highly  
44 efficient algorithm for predicting Z-flipons based on experimental data. We leverage the  
45 large number of orthogonal datasets from the human genome and ENCODE projects to  
46 evaluate the validity of many hypotheses and present here those that are not falsified by  
47 existing experimental evidence.

48  
49 We started with pretrained DNABERT model<sup>7</sup> and fine-tuned it with validated Z-flipons  
50 from human genome-wide experimental studies (Figure 1). The resulting Z-DNABERT  
51 significantly outperformed previous approaches, such as DeepZ <sup>8</sup> that are based on  
52 convolutional and recurrent neural networks, with a recall of 0.89, precision of 0.78, and  
53 ROC AUC of 0.99 (Supplemental Table 1). The algorithm generates easily interpretable  
54 attention maps of Z-prone sequences at nucleotide resolution (Figure 1, Supplemental  
55 Figure 1).

56  
57 A large number of datasets are available for mapping DNA variants to phenotype,  
58 enabling us to perform a deep analysis of how flipons encode genetic information. We  
59 restricted this work to regions of experimentally verified Z-DNA, focusing on those  
60 overlapping genomic variants previously identified by Genome-wide Association Studies  
61 (GWAS) and disease focused approaches. We then performed computational  
62 mutagenesis with Z-DNABERT to test directly whether SNP alleles affected Z-DNA  
63 formation, then used haplotype analysis to map flipon alleles to trait values. We also

64 assessed the role of Z-flipons in mendelian disease. Our findings expand the range of  
65 phenotypes attributable to Z-flipons beyond the human mendelian type I  
66 interferonopathies caused by loss of function (LOF) ADAR1 p150 variants <sup>1</sup>.

67 .

68

## 69 **Results**

### 70 **Developing generalizable deep learning model for Z-DNA prediction**

71 Currently there are two human experimental datasets available that provide  
72 information on Z-DNA formation within human cells: the Shin et al ChIP-seq (Chromatin  
73 Immunoprecipitation followed by DNA sequencing of fragments) experiments with a  
74 resolution of 100-150 basepairs (bp) <sup>9</sup> and the nucleotide resolution, permanganate/S1  
75 nuclease dataset (KEx) from Kouzine et al. <sup>10</sup>.

76 For the deep learning model, we chose DNABERT pretrained with 6-mers  
77 representation. The approach is based on the Bidirectional Encoder Representations  
78 from Transformers (BERT) algorithm <sup>7</sup>. We then trained the model further using the  
79 experimental datasets to create Z-DNABERT (Figure 1A, Methods and Supplemental  
80 Methods). We compared performance of Z-DNABERT with two other machine learning  
81 methods: DeepZ <sup>8</sup> and Gradient Boosting (CatBoost realization) <sup>11</sup>. The latter approach  
82 also learns from k-mers representation (Supplemental Table 1). Z-DNABERT showed  
83 high performance on F1 and ROC AUC when tuned with the large nucleotide resolution  
84 KEx set. Part of the reason is shown by the Shin et al analysis where attention can be paid  
85 to poor ZNA forming sequences such as AAAAAA that are also enriched in the small  
86 number of 100-150 bp fragments analyzed (Supplemental Table 2). We used the KEx-  
87 tuned model for the work presented here.

88 Z-DNABERT outputs attention maps that are easily visualized (Figure 1B,  
89 Supplemental Figure 1). One can analyze output summarized for all heads or that for a  
90 particular head. Unlike the black box results from neural nets, the zebra-stripe patterns  
91 produced are easily interpretable: they show the propensity of alternating  
92 purine/pyrimidine dinucleotide repeats to form Z-DNA. The dark stripes correspond to  
93 purine bases that flip from the *anti* to the *syn* conformation as the transition from the right-  
94 handed to the left-handed helix occurs. The preference for guanosine over adenosine

95 and cytosines over thymidine reflects the experimentally determined *in vitro* energetics  
96 that the Z-HUNT3 program uses to score Z-prone sequences <sup>12</sup>. Compared to the Z-  
97 HUNT3 output (“all-heads” column Figure 1B), attention maps provide extra information  
98 on the sequence dependence of B-Z junctions rather than assigning them a fixed energy  
99 cost. These additional details likely account for the slight differences in predicted ranking  
100 of Z-prone motifs compared to the experimental Z-DNA input data (Supplemental Table  
101 2). The Z-DNABERT model trained on human data also performed well in predicting Z-  
102 prone sequences from the mouse genome (Supplemental Table 3). Z-DNABERT also  
103 can predict the effect on Z-DNA formation of substituting any nucleotide in a sequence  
104 with another.

105

### 106 **Whole-genome prediction of Z-flipons**

107 With Z-DNABERT trained on nucleotide resolution KEx, we generated genome-  
108 wide whole genome maps of Z-DNA regions (Figure 1C and Supplemental Data 1-4),  
109 which resulted in 290,071 regions covering 3167809 bp (0,16%) of the hg38 genome  
110 build. The genomic coverage of predicted Z-flipons was much more extensive than that  
111 for KEx (Figure 1C versus Supplemental Figure 2). We observed colocalization of Z-  
112 flipons with candidate cis regulatory elements (cCRE) defined by the ENCODE  
113 Consortium in many regions, with a higher density of overlaps in sub-telomeric regions.  
114 The correspondence with CTCF(CCCTC-binding factor) enriched sites at cCRE  
115 promoters is quite evident (Figure 1C) <sup>13</sup> and more pronounced than when each feature  
116 is considered separately (Supplemental Figure 3). Around 30% of the predicted Z-flipons  
117 fell within promoters and were less than 1 kb from a transcription start sites (TSS), with  
118 around 40% less than 3 kb distant. 30% are located in the introns with 7% found in the  
119 first introns and another 30% comprise intergenic regions. The enrichment of Z-flipons in  
120 promoter regions is consistent with previous analyses (Figure 1D) <sup>14</sup>. Overall, the  
121 predicted Z-flipon set incorporates 92% of experimentally validated Z-DNA (Figure 1E  
122 and Supplemental Figure 2), but is 7 times larger. The maximum overlap of experimental  
123 Z-DNA vs predicted (95.32%) is observed in 5' exons <300 bp from the TSS  
124 (Supplemental Table 4). We did not detect substantial overlap with regions of G-banding  
125 or with high recombination (Supplemental Figure 3) <sup>15</sup>.

126

## 127 **Z-flipons are enriched in CTCF-bound proximal enhancer and promoter regions**

128

129 We explored the cCRE results presented in Figure 1C further. Almost 10% of the predicted  
130 Z-DNA fell into cCRE regions (91,292 out of 926,535). Specifically, enrichment was observed in  
131 CTCF-bound proximal enhancer (3-fold enrichment) and promoter (6.7 fold enrichment) regions  
132 (Figure 2A, Supplemental Data 1), consistent with a regulatory role for Z-flipons.

133 There were 393 of these transcription-associated cCRE regions where Z-flipons  
134 overlapped variants identified by GWAS. Among them, 86 (22%) are editing quantitative trait loci  
135 (edQTL) variants, 66 (17%) are expression QTL (eQTL) and 29 (7%) are splicing QTL (sQTL).  
136 Some of the QTLs are quite distant from the site of their effect, with some reported as more than  
137 400 kb from an affected RNA editing site. Such a distance between associated elements suggests  
138 that Z-flipons can act by altering the loop topology of chromatin domains to bring widely separated  
139 elements close together, facilitating their interaction <sup>16,17</sup>.

140

## 141 **Overlap of Quantitative Trait Loci with Z-flipons**

142 We overlapped predicted Z-flipons with disease associated variants from the  
143 GWAS catalog (Figure 2B and Supplemental Data 2). We observed 3.2-fold enrichment  
144 of GWAS single nucleotide polymorphisms (SNP) in Z-flipons. Out of 108,517 unique  
145 GWAS SNPs, 655 (0.6%) fell into Z-DNA regions. We compared experimental Z-DNA  
146 predictions with respect to overlap with GWAS variants, and found that Z-DNABERT  
147 predicts 95% (109 out of 115) variants from KEx. Expanding the GWAS associated region  
148 by 500 or 1000 bases either side further increased the overlap with Z-DNABERT hits to  
149 12440 and 20171 respectively (Supplemental Data 2).

150 We examined the overlap of Z-flipons with GWAS variants that are also QTLs for  
151 editing levels, expression level or splicing (Supplemental Data 2). Out of 661 variants  
152 from GWAS overlapping ZDNABERT, 215 (33 %) are edQTL, 149 variants (23%) are  
153 expression eQTL, and 78 variants (12%) are sQTL (Supplemental Data 2). We explored  
154 GO enrichment of variant falling in Z-flipons and found enrichment in positive regulation  
155 of transcription from RNA polymerase II promoter (GO:0045944 FDR =  $2.78E^{-04}$ ) and  
156 chromatin (GO:0000785 FDR =  $7.89 E^{-03}$ ) consistent with our other findings.

157           There was also a significant overlap of Z-flipons in the OMIM collection of  
158 mendelian variants (Figure 2D) that we will discuss later as we develop the evidence for  
159 the flipon dependent outcomes summarized in Figure 2E.

160

## 161 **Z-flipons in Action**

162

163           A natural question is to ask how flipon variants affect trait values. Our analyses identify  
164 two novel repeat motifs involved in expression and splicing, both differing from the conserved Alu  
165 Z-Box motif we previously identified as targeting A→I editing by the ADAR1 p150 isoform<sup>18</sup>. The  
166 first motif has a Z-RNA stem associated with loop containing an effector domain and the other  
167 represents a previously characterized intronic splicing enhancer sequence that can also fold into  
168 a Z-RNA helix.

## 169 **An eQTL in SCARF2 affects MED15 and Height**

170

171           The rs874100 SNP (NM\_153334.7:c.2459G>C), which encodes a nonsynonymous  
172 variant (NP\_699165.3:p.Gly820Ala) (Figure 3A), overlaps a predicted and experimentally  
173 confirmed Z-flipon (Figure 3B). The Z-DNABERT mutagenesis map reveals that the minor C allele  
174 disrupts Z-DNA formation (Figure 3C). The allele also prevents the fold of the SCARF2 transcript  
175 into Z-RNA (Figure 3D). The fold forms a loop anchored by the Z-RNA stem that contains a GU  
176 splice donor site at position 90, although there is no current evidence that the site is associated  
177 with alternative splicing.

178           The rs874100 SNP is an eQTL for the mediator complex subunit 15 (MED15) gene that is  
179 associated by GWAS with height. The microC map from human embryonic stem cells (hESC)  
180 reveals the presence of contacts between the rs874100 region and the MED15 promoter (Blue  
181 Box, Figure 3E). We were able to define four haplotypes that incorporate other neighborhood  
182 SNPs that are also associated with height (Figure 3F, G). The haplotypes also included the exon  
183 7 nonsynonymous SNP rs2241230 (NM\_153334.7:c.1273A>T variant  
184 (XP\_016884554.1:p.Thr425Ser), which is not an eQTL but rather a sQTL and the intron 6 variant  
185 rs882745 (NM\_153334.7:c.1203-97G>T) that is just upstream of an alternative splice site for  
186 SCARF2 (Figure 3H). We scored the haplotypes and identify those associated with high and low  
187 expression of MED15.

188           The ZNA prone haplotype H1 is associated with increased expression of MED15 while  
189 haplotype H4 with the rs874100 C allele that disrupts the Z-DNA stem has low expression. This  
190 finding is supported by the two intronic SNPs rs1558170 (NC\_000022.11:g.20433955C>G) and  
191 rs9610925 (NC\_000022.10:g.20789046T>A) that are in strong linkage disequilibrium with  
192 rs874100. The increased MED15 gene expression of H1 relative to H4 could partly reflect the  
193 nonsynonymous changes produced by the SCARF2 SNPs rather than through differences in Z-  
194 DNA formation. This explanation is less likely as the rs874100 amino acid substitution has been  
195 shown by clinical testing to be benign (ClinVar accession RCV000602615.1). Further, the variant  
196 produced lies in the disordered carboxy terminus of the protein and not within a functional domain.  
197 The other nonsynonymous SNP rs2241230, is not an eQTL for MED15, but a sQTL whose minor  
198 allele is associated with decreased splicing of MED15, likely offsetting the increased expression  
199 associated with the rs874100 G allele. The association of rs874100 with height may then reflect  
200 the higher expression of MED15 protein due to the formation of ZNAs by H1. The increased  
201 coupling between enhancers and promoters would increase cell growth by generating higher  
202 levels of transcripts and proteins. The altered splicing associated with rs2241230 may further  
203 affect MED15 expression levels by altering the isoforms produced.

204

## 205 **An eQTL in SMAD1 affects HDL cholesterol**

206

207           We observed a similar Z-RNA stem/loop motif in our analysis of eQTLs for SMAD1. The  
208 eQTLs present in the 5'UTR of the SMAD1 gene include rs13144151(A>G)  
209 (NC\_000004.11:g.146403165A>G) and rs13118865(C>T) (NG\_042284.1:g.5698C>T). The  
210 SNPs defined three haplotypes that express intermediate (H1), high (H2), and low (H3) levels of  
211 SMAD1 mRNA. Both H2 and H3 contain potential Z-RNA forming sequences. The high  
212 expressing H2 incorporates the minor G allele of rs13144151 that overlaps an experimentally  
213 validated Z-DNABERT prediction (Figure 4D). Mutagenesis mapping of rs13144151 with Z-  
214 DNABERT revealed that G allele caused a slight increase in Z-propensity. While not pronounced  
215 at the level of DNA, the effects of the allele on the RNA fold are quite evident (Figure 4G, H): the  
216 G allele stabilizes an additional potential Z-RNA helix by adding an extra G:C bp to increase its  
217 span to 6 bps, producing the minimal length substrate required to dock a Z $\alpha$  domain<sup>19</sup> (Figure  
218 4G, H). The low expressing H3 haplotype is defined by the minor alleles of rs13118865 and  
219 rs1264670 (G>A) (NC\_000004.11:g.146402927G>A). Rs1264670 is incorporated into an RNA  
220 fold motif similar to that of H1 with a Z-RNA stem and a hairpin loop domain (Figure 4I). Present



221 in the domain are two unpaired splice donor sites and many CGGG sites of the type bound by the  
222 alternative splicing factor RBM4 (RNA binding motif protein 4). Since RBM4 is known to suppress  
223 use of splice donor sites <sup>20</sup>, we refer to the hairpin as an effector domain.

224 Interestingly, the SNP minor alleles affecting SMAD1 expression map not only to  
225 haplotypes, but also to the exons defining different splice isoforms. The rs13144151 A allele that  
226 defines the H2 haplotype is present on exon 3, while H3 is defined by both the rs13118865 T  
227 allele on exon 4 and the rs1264670 A allele at the 3' end of exon 2 (as labeled in Figure 4A). The  
228 strength of Z-RNA formation associated with each exon likely affects the expression of each  
229 isoform. The transcription of isoforms containing exon 3 may be favored by the rs13144151 A  
230 allele that disrupts Z-RNA formation and allows RNA polymerase progression. In contrast, both  
231 exons 2 and 4 contain strong Z-RNA folds that could cause RNA polymerases, leading to lower  
232 readout of these isoforms.

233 The association of rs13144151 with HDL cholesterol levels (A allele = -0.018 unit decrease  
234 <sup>21</sup>) is consistent with the known role of SMAD1 in negatively regulating cholesterol efflux from  
235 cells. Increased SMAD1 expression leads to decreased levels of the cholesterol transporters  
236 ABCA1 and ABCG1, with lipid accumulation by macrophages producing foam cells that are  
237 associated with atherosclerosis <sup>22</sup>.

238

### 239 **A sQTL in CACNA1C affects DCP1B and BMI**

240

241 We also assessed the relative roles of Z-DNA and Z-RNA in splicing by analyzing sQTLs  
242 found in the 5' UTR of CACNA1C (calcium voltage-gated channel subunit alpha1 C) that alter  
243 processing of decapping1B protein (DCP1B) transcripts, DCP1B protein initiates mRNA decay by  
244 enzymatically removing the 5' cap from RNAs. The index SNP rs11062091  
245 (NG\_008801.2:g.87418G>A) is a sQTL for DCP1B splicing but is not currently with a phenotype.  
246 Of the SNPS in the region nearby, rs2470397 (NG\_008801.2:g.31165T>C) is a sQTL associated  
247 with BMI In a GWAS of BMI in nearly half a million individuals <sup>23</sup>; rs10774018  
248 (NG\_008801.2:g.82974G>C) is a sQTL associated with visceral obesity and height <sup>24,25</sup> and  
249 rs2108635 (NG\_008801.2:g.84605A>G) is associated with BMI but is not a QTL (Figure 5A).  
250 Haplotype analysis revealed that the major allele of rs11062091 is on a haplotype H3, which  
251 scored highest for splicing, while the minor allele is on H6, which has the lowest score. In these

252 haplotypes, rs2470397 alleles are not correlated with those of other SNPs, reflecting the high  
253 recombination rate recorded for this chromosomal segment (Figure 5B). Nevertheless, the  
254 rs2470397 minor C allele helps define haplotypes 3 and 6 and the association of the rs11062091  
255 minor A allele with low DCP1B splicing and increased obesity (Figure 5B). The effect on BMI may  
256 reflect the rate at which transcripts undergo decay, with H6 increasing the longevity of transcripts  
257 that promote adiposity.

258 The microC map from hESC showed contact between the region containing the alternative  
259 DCP1B splice site and rs11062091, both of which bear enhancer CCRE marks and an overlap  
260 with CTCF binding sites (Figure 5C and D). The region around rs11062091 has many predicted  
261 and experimental Z-flipons, yet Z-DNABERT mutagenesis maps revealed little effect of the SNP  
262 alleles on Z-DNA formation (Figure 5E). Analysis of the RNA fold revealed many regions of likely  
263 Z-RNA formation (red boxes) that did not align with experimentally validated Z-DNA (identified by  
264 heavy black lines). One of these contain a Z-RNA stem loop motif similar to those observed with  
265 SCARF2 and SMAD1 (Figure 5H).

266 With other Z-RNA stems, experimentally validated Z-DNAs aligned only with the upstream  
267 strand of the RNA and not its downstream complement. The only region where Z-DNA overlapped  
268 with both Z-RNA strands was the one that included rs11062091. The effect of the rs11062091  
269 minor A allele was to disrupt formation of this particular Z-RNA helical stem (Figure 5H). The  
270 results suggest that the two Z-DNA elements producing the rs11062091 Z-RNA nucleate the  
271 remaining RNA fold. They then provide an anchor to promote seed a spliceosome condensate.  
272 Indeed, rs11062091 is a sQTL for RP5-1096D14.6 and CACNA1C-IT2 in addition to DCP1B. The  
273 12 canonical CTCF motifs in Z-RNA associated effector domains could actively promote  
274 spliceosome formation by localizing CTCF to the region(Figure 5H) <sup>26</sup>. Similar interactions may  
275 contribute shown in Figure 1. the alignment of CTCF/cCRE regions.

276

277 The failure of Z-DNABERT to detect many of the Z-RNA in this fold may reflect that the  
278 experimental determination of Z-DNA was performed in a single cell line. Alternatively, the result  
279 may be due to the different energetics of Z-RNA formation compared with Z-DNA. The preformed  
280 RNA bulges and bp mismatches in dsRNA facilitate A-Z creation <sup>27</sup>, with each costing less energy  
281 than the 5 kcal/mol required for each B-Z-DNA junction. In the case of Z-RNA, formation of only  
282 a 6 bp binding site is required to dock the Z $\alpha$  domain <sup>19</sup>. This length is much shorter length than

283 Z-DNABERT is trained to discover (Supplemental Figure 2) as we require at least 11 contiguous  
284 bp.

285

## 286 **Z-flipons, Edited and Noncoding Transcripts**

287 The Z-DNABERT training limited our exploration of the local effects of Z-flipons  
288 within genes that contain known sites of A→I RNA editing. Indeed, Z-DNABERT does not  
289 detect the Z-RNA forming ALU sequencing known to impact ADAR1 editing of the  
290 cathepsin S (CTSS) RNA <sup>27,28</sup>. We also did not expect the KEx dataset that analyzed Z-  
291 DNA to identify folds relevant to Z-RNA editing.

292 Overall, we found very few cases of direct overlap of Z-flipons with editing sites in  
293 the analysis of a number of published datasets (Supplemental Data 3). As many editing  
294 substrates are long, we also searched for Z-flipons in the 1kb surrounding the editing site  
295 and found a higher overlap. One experimental study explored editing substrates  
296 recognized by the Z $\alpha$  domain of ADAR p150 <sup>29</sup>. Of the 1248 mRNAs identified, none had  
297 a Z-DNABERT overlap. Expanding the search window for a Z-flipon prediction to 1kb  
298 revealed that only 4% of the ADAR1 p150 editing sites overlapped. A separate study of  
299 lung adenocarcinoma tumors <sup>30</sup> found 1413 genes where the total level of RNA editing  
300 and expression were correlated. Of these, 5% of edited sites have a direct overlap with  
301 Z-flipons (Supplemental Data 3). Expanding the region of search for Z-flipons within 1kb  
302 of editing sites yielded a 19% overlap. We further found that 182 of the transcripts  
303 immunoprecipitated with the ZNA specific antibody Z22 from mouse embryonic fibroblasts  
304 <sup>6</sup> (Supplemental Data 3), providing some experimental evidence suggestive of Z-flipon  
305 conservation between mouse and human. For the ADEditome database, which maps  
306 1,676,363 editing sites associated with Alzheimer's Disease, only 271 overlapped a Z-  
307 flipon prediction, of which 6 were validated experimentally (Supplemental Table 5). In  
308 contrast Z-flipons were found within 1kb of editing sites in 50% of ADEditome genes  
309 (Supplemental Table 6).

310 The cases where we were able to overlap Z-flipons with editing sites were for Z-  
311 RNA stems 12 bp or longer (Supplemental Figures 6,7). The STXBP5L intronic dsRNA  
312 identifies in that manner was short and heavily edited (Figure 6). In contrast only a single

313 edit (reproduced in the lung adenocarcinoma dataset(Supplemental Data 3 and in the  
314 Rediportal database) is present in the BIRCA transcript, raising the question of whether  
315 the edit is functional or whether it indicates that binding ADAR1 p150 has other outcomes.  
316 Interestingly this site is targeted by hsa-miR-8485 (and potentially by hsa-miR-574-5p and  
317 hsa-miR-297) that is bound by TDP-43 (encoded by TARDBP) to regulate a number of  
318 outcomes <sup>31</sup> raising the possibility that ADAR1 p150 regulates the access of hsa-miR-  
319 8485 to the BICRA transcript. Another instance where Z-RNA may enable regulation of  
320 noncoding RNAs is provided by RMRP (RNA component of mitochondrial RNA  
321 processing endoribonuclease) (Supplemental Figure 8) that performs many different  
322 functions through interactions involving miRNAs <sup>32</sup>

### 323 **ZNF587B and RNA editing**

324

325 A predicted and experimentally validated Z-flipon within ZNF587B gene that is associated  
326 with many nonsynonymous edits lead us to investigate the locus further (Figure 6). The gene is  
327 in one of the zinc finger (ZNF) gene clusters enriched on chromosome 19 (Supplemental Figure  
328 9). Depending on how it is spliced, ZNF587B contains up to 13 zinc finger domains (ZNF), plus a  
329 KRAB (Krüppel associated box) domain of the kind thought to mediate repression of transposon  
330 repeat elements <sup>33</sup>. ZNF587B RNA editing is promoted by a number of ALU inverted repeats (AIR)  
331 similar to those of known ADAR1 substrates (Figure 6A). They overlap the terminal exon of one  
332 RNA isoform and result in RNA recoding specific to that transcript (Figure 6B and C). A different  
333 type of RNA fold directs editing of the other ZNF587B splice isoform (Figure 6B). Interestingly,  
334 the dsRNA in this region forms from heptamer repeats (HR) that create clusters of unpaired RNA  
335 loops distinct from the long, linear AIR substrates (Figure 6C, D and E). The HR has purine-  
336 pyrimidine inverted repeats capable of forming short Z-prone dsRNA helices <sup>19,27</sup> that resemble  
337 those clusters we recently identified in mouse by immunoprecipitation with ZNA specific Z22  
338 antibody <sup>6</sup>.

339 The length of the HR is conserved. It encodes the linker between adjacent ZNF (Figure  
340 6D). Interestingly, the CACA motif overlaps that of known intronic splicing enhancers <sup>34</sup>, raising  
341 the possibility that Z-RNA formation by the HR modulates alternative splicing. The arrangement  
342 of ZNF in clusters may enable intergenic splicing to generate new combinations of ZNFs at the  
343 RNA level. Evidence for the alternative splicing and trans-splicing from the Swiss Institute of  
344 Bioinformatics curated dataset is shown in Figures 6F- H.

345           The generation of these novel transcripts would be favored by the interferon induction of  
346 the known Z-RNA binding proteins ADAR1 p150 and ZBP1. The non-synonymous edits scattered  
347 through the fold are consistent with Z-RNA dependent localization of p150 to these transcripts.  
348 None of the edits alter the three residues (called -1, 3 and 6 as numbered on the bottom line of  
349 Figure 6D) that are involved in DNA recognition by ZNF<sup>35</sup>, so do not change the specificity of the  
350 ZNF. The altered splicing rather than RNA editing may be the major outcome produced by ADAR1  
351 p150 as binding of p150 to the Z-RNA helix would occlude the site and make it unavailable to the  
352 splicing machinery. Alternatively, the interaction could help direct the locus to a spliceosome  
353 condensate. The novel combinations of ZNF produced by alternative splicing could prevent the  
354 escape of recently recombined transposons and viruses from KRAB mediated suppression.

355

### 356 **Z-flipons, Mendelian Disease and LOF Variants**

357           We also examined Z-flipons for association with mendelian disease (Supplemental  
358 Data 4 and Supplemental Figures 10-18) given the previous emphasis placed on Z-DNA  
359 as a cause of genomic instability<sup>36</sup>. There is overlap between experimentally determined  
360 Z-flipons and mendelian variants in a number of genes including HBA1  
361 (hemoglobinopathies), CDKN2A (Melanoma Susceptibility), MC1R (red hair color,  
362 melanoma), WNT1(Osteogenesis Imperfecta, type xv), NPHS1 (Nephrotic Syndrome,  
363 Type 1), SOX10 (Waardenburg Syndrome, Type 2e), IDUA (Hurler-Scheie Syndrome),  
364 LAMB3 (Heterotaxy), IL17RC (Familial Candidiasis) and FOXL2 (Blepharophimosis,  
365 Ptosis, And Epicanthus Inversus, Type I), providing direct evidence that Z-flipons do  
366 influence trait variation. Predicted Z-flipons also overlap with a more extensive range of  
367 OMIM phenotypes. Examples include TERC, the telomerase RNA, TERT, TP53, LMNA,  
368 NKX2.5, HBA2 and NROB1. Overall, we found an overlap of mendelian disease-causing  
369 variants with predicted (n=372) and experimentally validated (n=124) Z-flipons in 8.6%  
370 and 2.9% of OMIM genes(n=4343) respectively (Figure 2D). The majority of events (71%)  
371 with experimentally validated Z-flipons were due to nonsynonymous variants that altered  
372 arginine codons in 22% of cases (Supplemental Figure 19) while 22% of variants were  
373 LOF frameshifts (Supplemental Figure 20). We also analyzed the 430,056 predicted LOF  
374 (pLOF) variants listed in the Genome Aggregation Database (gnomAD) that are  
375 distributed over 18749 unique genes<sup>37</sup>. Of these, 4362 variants fell into predicted Z-

376 flipons. Interestingly, of the 1160 variants present in the KEx dataset, 1093 (94.2%) are  
377 in the gnomAD-pLOF set. Frameshift deletions were also more frequent with Z-flipon  
378 overlaps compared to other Z-flipon LOF classes and compared to the entire gnomAD-  
379 pLOF variant collection (Supplemental Figure 21 and Supplemental Data 5). Overall, 637  
380 of the 2614 Z-flipon LOF genes (24.7%) overlapping the gnomAD-pLOF have OMIM  
381 morbid phenotypes (n=4343), compared to 21.5% of the gnomAD-pLOF genes.  
382 Interestingly, the overlap of the Z-flipons present in the gnomAD-pLOF with OMIM genes  
383 is much higher than the actual number of Z-flipons recorded in OMIM. There is a 14.7%  
384 overlap of genes with gnomAD-pLOF predicted Z-flipon variants and a 3.9% overlap with  
385 genes containing experimentally validated Z-flipons (Supplemental Figure 22,  
386 Supplemental Data 5). GO analysis of Z-flipon mendelian variants annotated in OMIM  
387 showed enrichment for transcriptional activity, homeobox proteins and transforming  
388 growth factor regulators of the extra-cellular matrix (Supplemental Data 4).

389

390

## 391 **Discussion**

392 Discovering the functional roles of Z-flipons and mapping the associated  
393 phenotypes is a challenging task, as previously noted<sup>38</sup>. We used genome-wide data and  
394 computational experiments to genetically map flipons to QTLs and disease outcomes.  
395 We used a machine learning approach called Z-DNABERT to detect Z-flipons by tuning  
396 the transformer algorithm implemented in DNABERT<sup>7</sup> with experimentally validated Z-  
397 DNA forming sequences obtained from the human genome at nucleotide resolution. Z-  
398 DNABERT outperformed previous approaches based on neural networks and enabled  
399 the findings reported here. Z-DNABERT was also helpful in finding Z-RNAs but did not  
400 directly detect those Z-RNA that we and others have demonstrated experimentally where  
401 the dsRNA helix length is shorter than 12 nucleotides long<sup>6,18,27</sup>. The difficulty derives  
402 from the different energetic requirements for Z-DNA formation compared to Z-RNA,  
403 especially in the cost of establishing the junction between left and right-handed helices.  
404 The penalty is lower for Z-RNA than for Z-DNA as loops and mismatches facilitate RNA  
405 junction formation. Also, as with any dsRNA, Z-RNA requires close proximity of two  
406 complementary sequences, something Z-DNABERT is not trained to find. Despite these

407 limitations we were able to use the ability of Z-DNABERT to perform computational  
408 mutagenesis to distinguish between Z-DNA and Z-RNA dependent events. Overall, we  
409 associate experimentally validated Z-flipons with active promoters that we then link to  
410 quantitative and disease phenotypes through the analysis of orthogonal genome-wide  
411 datasets. The work furthers our understanding of flipon biology and establishes a  
412 community resource. The hypotheses generated are data-driven and open new lines of  
413 enquiry into the germline and somatic mechanisms that lead to QTL variation and  
414 disease. They provide additional insights into pathways that produce intracellular  
415 immunity against retroelements and pathogens. They also suggest a role for Z-RNAs in  
416 regulating the interactions of noncoding RNA with other transcripts (Figure 2E) and  
417 establish a close connection between Z-flipons, CTCF and loop formation and information  
418 readout from the genome.

419 We were able to quantitate the number of genes where Z-flipon variants are causal  
420 for mendelian diseases by starting with experimentally validated Z-DNA forming  
421 sequences and using these results to predict additional Z-flipons in the genome. We  
422 found a direct overlap between mendelian disease-causing variants with predicted  
423 (n=372) and experimentally validated (n=124) Z-flipons in 8.6% and 2.9% of OMIM  
424 genes(n=4343) respectively (Figure 2D). This conservative approach misses those OMIM  
425 genes where the variants impacting Z-flipon biology are not in the region of overlap.

426 The LOF alleles identified were enriched for frameshifts, with homeobox genes  
427 and other transcriptional regulators showing increased susceptibility (Supplemental Data  
428 4). The flipons involved are likely those prone to freeze in the left-handed conformation  
429 either due to their length or location in genomic regions of high topological stress, resulting  
430 in DNA breaks and error prone repair that increases the frequency of variation. Such  
431 events may be prevalent early in development when cell cycles are as short as 3 hours  
432 and hypertranscription is prevalent<sup>39</sup>. Despite the low frequency of their occurrence, the  
433 Z-flipon LOF variants may produce mendelian disease more often than more common  
434 causes of DNA damage because they induce frameshifts with higher penetrance.

435 We identified additional LOF variants that overlap Z-flipons in the predicted  
436 gnomAD-pLOF collection, but which are not currently associated with mendelian disease  
437 (Supplemental Figure 22). Their negative impact may be lessened by alternative splicing,

438 as variants affecting splice sites are more frequent in gnomAD-pLOF<sup>40</sup> than we observe  
439 with direct OMIM Z-flipon overlaps. Other mechanisms such as transcript destabilization,  
440 nonsense-mediated RNA decay and limited or tissue-specific expression could also play  
441 a role. Additionally, it is likely that many pLOF variants are somatic rather than germline  
442<sup>41,42</sup>. Z-flipons also overlap nonsynonymous variants that produce mendelian disease.  
443 Around 22% affect arginine codons that contain the Z-prone CG dinucleotide. Yet, there  
444 is no evidence that these codons are replaced by the alternative less Z-prone AGG or  
445 AGG arginine codons, even though the HBA1 locus clearly demonstrates the possibility  
446 of wide-ranging codon replacements in Z-flipon sequences (Supplemental Data 4,  
447 Supplemental Figure 10), suggesting that Z-flipon forming sequences are of sufficient  
448 biological utility to conserve.

449 We found that many of the effects of Z-flipons in normal cells likely occur at the  
450 level of Z-RNA and involve motifs that have a Z-RNA stem paired with a hairpin loop  
451 containing an effector domain. One such example in SMAD1 RNA is characterized by  
452 RBM4 binding motifs that promote alternative splicing by suppressing use of splice donor  
453 sites. Similar motifs with different effector domains were present in SMAD1, SCARF2 and  
454 CACANA1 RNAs. We found examples where disruption of a Z-RNA stem by a SNP allele  
455 was associated with the reported GWAS phenotype.

456 We identified a different motif in which an inverted HR formed a Z-RNA stem by base  
457 pairing with another HR. The motif was present in ZNF587B RNA, which has 13 C2H2 (two  
458 cysteines, two histidines) ZNF and related proteins that also contain ZNFs and a KRAB domain  
459 that suppresses the expression of transposons and viruses by binding to relatively conserved  
460 sequences in their genomes. Together this family of proteins constitutes an intracellular form of  
461 immunity to protect against such threats<sup>33</sup>. Here we provide evidence that the system is adaptive.

462 The HR in these proteins links together adjacent ZNFs<sup>43</sup>. The sequence has some  
463 remarkable properties. In addition to having the propensity to form Z-RNA, the repeat sequence  
464 has a strong match to a previously characterized intronic splice enhancer<sup>34</sup>. Additionally, the HR  
465 resembles a recombination recognition sequence (RSS) that is cleaved by RAG1 during  
466 immunoglobulin gene rearrangement<sup>44</sup>. These HR properties suggest multiple mechanisms  
467 operating at both the DNA and RNA level for adapting the composition of ZNFs to transposon and  
468 viral recombinants that rearrange the conserved binding sites recognized by a ZNF array. At the  
469 DNA level, a protein like RAG could create new ZNF arrays through site-specific recombination



470 as occurs in B and T cell receptor genes. We did not find evidence for an increased rate of indels  
471 or gene fusions associated with ZNFs in cancer datasets, especially in liver tissues where stellate  
472 cells express high levels of RAG1. Noteworthy is the elevated level of missense mutation in some  
473 cancer types at positions 9 and 11 of many ZNFs <sup>35</sup> adjacent to the HR “ACA” sequence that  
474 RAG1 would cleave. DNA site specific recombination between ZNF HPs could operate over  
475 longer time periods to diversify ZNF arrays. The recombination events may account for the  
476 clusters that are now present on chromosome 19 (Supplementary Figure 9) and for the  
477 observation that 179 of 252 degenerate Zinc fingers listed in UNIPROT are found in the KRAB  
478 domain containing C2H2 ZNF family.

479 In contrast, generating variation at the RNA level is a much more rapid process <sup>45</sup>. While  
480 RNA editing recodes ZNF, we did not find nonsynonymous edits that affected the key ZNF nucleic  
481 binding sites. Instead, we found evidence supporting the possibility of an adaptive system based  
482 on trans-splicing within ZNF gene clusters, possibly by occlusion of HR splice enhancer sites by  
483 proteins engaging them as Z-RNA. Such RNA recombination events do not change the specificity  
484 of the ZNF but generate new permutations to match a novel transposon or viral rearrangement.  
485 Those that enable a cell’s survival likely will be fixed in that cell by epigenetic modifications.  
486 Alternatively, they may be fixed by reverse transcription <sup>45</sup>, possibly using a cleaved HR as a  
487 primer to embed the new ZNF combination in an existing ZNF gene.

488 Interestingly, the unique chromatin structure of C2H2 ZNF clusters reduces  
489 recombination of these regions by localizing the H3.3 variant to ZNF containing exons through  
490 interactions dependent upon ZNF274 and the ATRX chromatin remodeling complex <sup>46-48</sup>. At the  
491 same time, alternative splicing in this region is favored by the increased levels of H3K36me3  
492 present <sup>49</sup>. A similar chromatin structure is present at telomeres and also decreases  
493 recombination. Interestingly, the same structure is also found at the HBA1 locus <sup>50,51</sup>. Taken  
494 together, the findings raise the possibility that this unique chromatin structure enhances  
495 evolutionary adaptation by allowing rapid variation in rates of DNA recombination and RNA  
496 processing of the associated genes. The diversity of outcomes produced increases the probability  
497 that some individuals will survive when an existential threat emerges. Malaria is one pathogen  
498 that drives HBA1 variation <sup>52</sup>, while alternative telomere maintenance in cancer cells through  
499 enhanced recombination of chromosomal ends proves another example of how effective this  
500 mechanism can be <sup>53</sup>.

501 The results we describe here are consistent with a model where ZNAs localize proteins  
502 to a site where they act. With Z-DNA, the chromatin structures and condensates formed can

503 enable approximation of distant regions through loop formation. With Z-RNA, the proteins docked  
504 to the effector domains promote specific outcomes. In other cases, Z-RNA binding proteins may  
505 occlude sites used for splicing or for interactions with noncoding RNAs. The recognition of left-  
506 handed DNA and RNA allows efficient localization of the cellular machinery to active loci and foci  
507 where ZNA formation is energized. The process exploits the propensity of short repeat sequences  
508 to form alternative nucleic acid structures<sup>54</sup>. Z-flipons otherwise have low intrinsic informational  
509 value but are widely distributed through the genome, opening up a number of possibilities for  
510 regulating the readout of genetic information<sup>55,56</sup>. Through their effects on RNA splicing, editing  
511 and expression, Z-flipons can affect a wide range of phenotypes. The work here provides a  
512 roadmap for further exploration of the fliponware involved.

513

## 514 **Methods**

### 515 **Experimental Z-DNA training data**

516 Permanganate/S1 Nuclease Footprinting Z-DNA data contained 41 324 regions  
517 with total length of 773 788 bp in human<sup>10</sup>. The original dataset was filtered for ENCODE  
518 blacklisted regions. For DNABERT the data was preprocessed by converting a sequence  
519 into 6-mer representation. Each nucleotide position is represented by a k-mer consisting  
520 of a current nucleotide and the next 5 nucleotides. The data was split into 5 stratified folds  
521 so we could train 5 individual models with 80% of the data and assess precision and recall  
522 using the remaining 20%. Due to the large imbalance between positive (Z-DNA) and  
523 negative (not Z-DNA) classes we randomly sampled twice as many of the negative class  
524 from the Kouzine et al. human data.

525

### 526 **Deep learning transformer-based model training**

527 DNABERT was fine-tuned for the Z-DNA segmentation task with the following  
528 hyperparameters: epochs =3, max\_learning\_rate = 1e-5, learning\_rate\_scheduler =  
529 one\_cycle (warmup 30%) batch size = 24. We trained 5 models, each on 80% of the  
530 positive class examples, and randomly sampled negative class examples. For each 512  
531 bp region from the whole genome the final prediction was made by averaging the  
532 predictions of the models that used data not seen during training.

533

## 534 **Model performance**

535 To estimate the model performance we computed precision, recall, F1 and ROC  
536 AUC on the test set and for whole-genome predictions (Supplemental Table 1). For  
537 benchmark models we applied DeepZ and Gradient boosting methods. DeepZ model was  
538 run with the set of 1054 omics features as described in <sup>8</sup> for human Shin et al. data set <sup>9</sup>.  
539 Predictions for the test set and whole genome were done the same way as for DNABERT  
540 models. CatBoost <sup>11</sup> was selected as a gradient boosting benchmark model since  
541 CatBoost can use categorical features as an input. The boosting model was trained on  
542 the same training set as DNABERT and DeepZ. Each segment from the training set has  
543 been encoded into boosting records. Each nucleotide was transformed into DNA segment  
544 with 256 + 5 nucleotides. The DNA segment was decomposed in 256 6-mers, and every  
545 6-mer from this DNA segment was mapped to a number from a set of all possible  
546 enumerated 6-mers. The resulting categorical vector of length 256 was subsequently  
547 used as an input for a boosting model. The Z-DNA was located in the center of the 256  
548 bp DNA targets. All encoded sequences formed a training set that was randomly down  
549 sampled to 400 000 objects due to calculation limitations. Test set measurements were  
550 performed on the whole test set encoded in the same way.

551

## 552 **Attention visualization**

553 Attention visualization was done with DNABERT-viz tool as described in the original  
554 DNABERT paper <sup>7</sup>.

555

## 556 **Mutagenesis maps**

557 To produce mutagenesis maps, Z-DNABERT was first run using original sequence, then  
558 for each site, every nucleotide was replaced with the three alternative nucleotides and the  
559 effect of each substitution was calculated as the sum of  $\log(1+p)$  over each sequence  
560 position where  $p$  is the probability of Z-DNA formation predicted by the model. By adding  
561 1 to  $p$ , we avoided problems with taking the log of a zero probability. The approach allows  
562 us to take into account the effects of adjacent sequences on Z-DNA formation,  
563 incorporating information of junction formation and cooperativity effects that drive the  
564 transition. The heatmap shows the effect of each substitution relative to the original

565 sequence, with the ratio of the two scores reflecting the probability that each will form Z-  
566 DNA in that particular context.

567

### 568 **Z-flipon overlap with quantitative trait loci and sites of alternative RNA processing**

569 GWAS catalogue data files were downloaded from <https://www.ebi.ac.uk/gwas/> (v. 1.0) <sup>57</sup>. Data  
570 on eQTL, sQTL and edQTL were download from The GTEX portal <https://www.gtexportal.org/> (v  
571 8.0) The Swiss Bioinformatics Institute track for alternative splicing <sup>58</sup> was accessed through the  
572 UCSC browser. Annotation for ENCODE cCREs combined from all cell types was downloaded  
573 from UCSC genome browser (data last updated 2020-05-20). Deleterious protein variants were  
574 downloaded from the gnomAD-pLOF database (v 2.1.1) <sup>37</sup>.

575

### 576 **Z-flipon overlap with RNA-editing databases**

577

578 Z-RNA editing sites from 1413 genes in lung adenocarcinoma tumors was taken from  
579 Sharpnack et al. research <sup>30</sup>. 113 ADAR1 p150-dependent sites were taken from <sup>29</sup>  
580 Editing sites, associated with Alzheimer's Disease, were downloaded from ADeditome  
581 database <sup>59</sup> and also from Rediportal (<http://srv00.recas.ba.infn.it/atlas/search.html>) <sup>60</sup>.

582

### 583 **RNA structural analysis**

584 RNA secondary structure was predicted with RNA-fold from Vienna Package <sup>61</sup>.

585

### 586 **Haplotype Analysis**

587 Haplotypes were determined using the LDLink tool <sup>62</sup>. Each haplotype was scored by assigning  
588 +1 to the alleles that increased trait values and -1 otherwise. For SNPs where quantitative trait  
589 measures were unavailable, each allele was assigned a value of 0.

590

591

592 **Availability and implementation:** The code is freely available at:

593 <https://github.com/mitiau/Z-DNABERT>

594 The Z-DNABERT tool is freely available

595 at:[https://colab.research.google.com/github/mitiau/Z-DNABERT/blob/main/ZDNA-  
596 prediction.ipynb](https://colab.research.google.com/github/mitiau/Z-DNABERT/blob/main/ZDNA-prediction.ipynb)

597

## 598 **Acknowledgements**

599 The publication was supported by the grant for research centers in the field of AI provided  
600 by the Analytical Center for the Government of the Russian Federation (ACRF) in  
601 accordance with the agreement on the provision of subsidies (identifier of the agreement  
602 000000D730321P5Q0002) and the agreement with HSE University No. 70-2021-00139.

603

## 604 **Grant Support**

605 The work was supported by the Basic Research Program of the National Research  
606 University Higher School of Economics, for which A.H. is an International Supervisor.

607

## 608 **Conflict of Interest**

609 AH is the founder of InsideOutBio, a company that works in the field of immuno-oncology.  
610 The authors declare that the research was conducted in the absence of any commercial  
611 or financial relationships that could be construed as a potential conflict of interest

612

## 613 **Contributions**

614 DU developed Z-DNABERT while DK, AD, NB and AF contributed analyses under the  
615 direction of VK, AH and MP. AH and MP wrote the manuscript and prepared figures with  
616 assistance from the other co-authors.

617

618

## 619 **Supplemental Materials**

620

### 621 **Z-DNABERT: Fine-tuning DNABERT for Z-DNA prediction.**

622

623 When comparing the test set and whole genome prediction results (Supplemental Table  
624 1), the recall metric does not change much, so the models correctly find all the regions  
625 labeled as Z-DNA. Meanwhile, the precision drops sharply, indicating many false  
626 positives in the model's predictions. These false positives could be predictions of novel

627 potential Z-forming regions that were not detected under the experimental conditions  
628 used as only a subset of all-possible Z-flipons is active in the cell line used. Supporting  
629 this idea is the higher precision of the Kouzine et al data compared to ChIP-seq data. The  
630 former has more nucleotides labelled as Z-DNA 0,02% (815 thousand out of 3 billion)  
631 compared to the human ChIP-seq data (0,004%, 136 thousand out of 3 billion  
632 nucleotides). Also, very high ROC-AUC metrics on whole-genome data show that the  
633 model false-positives have probability scores consistently lower than true positives, which  
634 could indicate that the regions detected as false-positive are actually regions which have  
635 a lower probability of forming Z-DNA in the cells tested.

636

637

### 638 **Learning Z-DNA sequences from attention maps**

639

640 It was noticed experimentally that CG/TG/CA repeats are more prone to flip from B- to Z-  
641 conformation. However, the detailed analysis of experimentally determined Z-DNA  
642 regions showed that other sequences also form Z-DNA, including sequences such as  
643 GGGG where the pyrimidine base is replaced by guanine. Transformer architecture  
644 allows interpretation of important features by analysis of attention maps. Results can be  
645 interpreted according to the difference in the expected frequency of k-mers in the input  
646 sequence versus their rank in the output and compared to the frequency in the genome  
647 or in the genomic region of interest. This approach is helpful for assessing ChIP-seq data,  
648 as a priori, the distribution of ZHUNT3 predicted Z-flipons in the genome is highly biased  
649 towards promoters. Many sequences associated with promoters, such as TATA boxes or  
650 GC rich segments will have high frequencies in the pull-downs independently of their  
651 ability to flip to Z-DNA.

652 The distributions of 6-mers according to their rank in the attention map are given in  
653 Supplemental Table 2. When the model is learning it pays attention not only to the k-mers  
654 inside Z-DNA regions but also to the k-mers in the flanking regions. For example,  
655 according to attention ranking k-mer GGGGAA is the 7th most frequent that the model  
656 uses to define Z-DNA, however this k-mer is the 40th according to the frequency of

657 occurrence inside Z-DNA regions. Also, k-mers GGGGAA CAGGGA TGGGGA  
658 GGGGGA AGGGAG GGGAGC are rarely at the site of Z-DNA nucleation, they likely can  
659 propagate the flip to Z-DNA once it is initiated. In the model, they appear important for Z-  
660 DNA prediction in the nearby sites where alternating pyrimidine/purine sequences may  
661 be the first segments to flip conformation.

662 To investigate further how Z-DNABERT recognizes GT and CA repeats we selected  
663 regions from Kouzine et al. human dataset. These repeats are located within 10 bp of  
664 each other. Summary attention heatmaps (sum of attention weights from all 12 heads for  
665 each position) for various regions are depicted in Supplemental Figure 1.

666

667

## 668 **Z-DNABERT cross-species predictions and other applications**

669 We tested how well Z-DNABERT model trained on one genome can predict Z-DNA  
670 regions in another genome. Supplemental Figure 3 show the results of the model  
671 performance that was trained on mouse and then applied on human genome using  
672 Kouzine et al. data sets. Performance metrics remain high. The Z-DNA prediction tool  
673 published at [https://colab.research.google.com/github/mitiau/Z-](https://colab.research.google.com/github/mitiau/Z-DNABERT/blob/main/ZDNA-prediction.ipynb)  
674 [DNABERT/blob/main/ZDNA-prediction.ipynb](https://colab.research.google.com/github/mitiau/Z-DNABERT/blob/main/ZDNA-prediction.ipynb) allows a user to input sequence into our  
675 pretrained model to identify Z-flipons with a high level of confidence.

676

## 677 **References**

678

- 679 1. Herbert, A. Mendelian disease caused by variants affecting recognition of Z-DNA and Z-  
680 RNA by the Z $\alpha$  domain of the double-stranded RNA editing enzyme ADAR. *Eur J Hum*  
681 *Genet* **28**, 114-117 (2020).
- 682 2. Jiao, H. *et al.* ADAR1 averts fatal type I interferon induction by ZBP1. *Nature* **607**, 776-  
683 783 (2022).
- 684 3. Hubbard, N.W. *et al.* ADAR1 mutation causes ZBP1-dependent immunopathology.  
685 *Nature* **607**, 769-775 (2022).
- 686 4. de Reuver, R. *et al.* ADAR1 prevents autoinflammation by suppressing spontaneous  
687 ZBP1 activation. *Nature* **607**, 784-789 (2022).
- 688 5. Herbert, A. To "Z" or not to "Z": Z-RNA, self-recognition, and the MDA5 helicase. *PLoS*  
689 *Genet* **17**, e1009513 (2021).

- 690 6. Zhang, T. *et al.* ADAR1 masks the cancer immunotherapeutic promise of ZBP1-driven  
691 necroptosis. *Nature* **606**, 594-602 (2022).
- 692 7. Ji, Y., Zhou, Z., Liu, H. & Davuluri, R.V. DNABERT: pre-trained Bidirectional Encoder  
693 Representations from Transformers model for DNA-language in genome. *Bioinformatics*  
694 **37**, 2112-2120 (2021).
- 695 8. Beknazarov, N., Jin, S. & Poptsova, M. Deep learning approach for predicting functional  
696 Z-DNA regions using omics data. *Scientific Reports* **10**(2020).
- 697 9. Shin, S.I. *et al.* Z-DNA-forming sites identified by ChIP-Seq are associated with actively  
698 transcribed regions in the human genome. *DNA research : an international journal for*  
699 *rapid publication of reports on genes and genomes* (2016).
- 700 10. Kouzine, F. *et al.* Permanganate/S1 Nuclease Footprinting Reveals Non-B DNA  
701 Structures with Regulatory Potential across a Mammalian Genome. *Cell systems* **4**, 344-  
702 356 (2017).
- 703 11. Dorogush, A.V., Ershov, V. & Gulin, A. CatBoost: gradient boosting with categorical  
704 features support. *ArXiv* **abs/1810.11363**(2018).
- 705 12. Ho, P.S. Thermogenomics: thermodynamic-based approaches to genomic analyses of  
706 DNA structure. *Methods* **47**, 159-67 (2009).
- 707 13. Consortium, E.P. *et al.* Expanded encyclopaedias of DNA elements in the human and  
708 mouse genomes. *Nature* **583**, 699-710 (2020).
- 709 14. Champ, P.C., Maurice, S., Vargason, J.M., Camp, T. & Ho, P.S. Distributions of Z-DNA  
710 and nuclear factor I in human chromosome 22: a model for coupled transcriptional  
711 regulation. *Nucleic acids research* **32**, 6501-10 (2004).
- 712 15. Rich, A., Nordheim, A. & Wang, A.H.J. The Chemistry and Biology of Left-Handed Z-  
713 DNA. *Annual Review of Biochemistry* **53**, 791-846 (1984).
- 714 16. Nora, E.P. *et al.* Spatial partitioning of the regulatory landscape of the X-inactivation  
715 centre. *Nature* **485**, 381-5 (2012).
- 716 17. Dixon, J.R. *et al.* Topological domains in mammalian genomes identified by analysis of  
717 chromatin interactions. *Nature* **485**, 376-80 (2012).
- 718 18. Herbert, A. Z-DNA and Z-RNA in human disease. *Communications Biology* **2**, 7 (2019).
- 719 19. Placido, D., Brown, B.A., 2nd, Lowenhaupt, K., Rich, A. & Athanasiadis, A. A left-  
720 handed RNA double helix bound by the Z alpha domain of the RNA-editing enzyme  
721 ADAR1. *Structure* **15**, 395-404 (2007).
- 722 20. Wang, Y. *et al.* The splicing factor RBM4 controls apoptosis, proliferation, and migration  
723 to suppress tumor progression. *Cancer Cell* **26**, 374-389 (2014).
- 724 21. Richardson, T.G. *et al.* Evaluating the relationship between circulating lipoprotein lipids  
725 and apolipoproteins with risk of coronary heart disease: A multivariable Mendelian  
726 randomisation analysis. *PLoS Med* **17**, e1003062 (2020).
- 727 22. Feng, J. *et al.* BMP4 enhances foam cell formation by BMPR-2/Smad1/5/8 signaling. *Int*  
728 *J Mol Sci* **15**, 5536-52 (2014).
- 729 23. Zhu, Z. *et al.* Shared genetic and experimental links between obesity-related traits and  
730 asthma subtypes in UK Biobank. *J Allergy Clin Immunol* **145**, 537-549 (2020).
- 731 24. Karlsson, T. *et al.* Contribution of genetics to visceral adiposity and its relation to  
732 cardiovascular and metabolic disease. *Nat Med* **25**, 1390-1395 (2019).
- 733 25. Richardson, T.G., Sanderson, E., Elsworth, B., Tilling, K. & Davey Smith, G. Use of  
734 genetic variation to separate the effects of early and later life adiposity on disease risk:  
735 mendelian randomisation study. *BMJ* **369**, m1203 (2020).



- 736 26. Alharbi, A.B., Schmitz, U., Bailey, C.G. & Rasko, J.E.J. CTCF as a regulator of  
737 alternative splicing: new tricks for an old player. *Nucleic Acids Res* **49**, 7825-7838  
738 (2021).
- 739 27. Nichols, P.J. *et al.* Recognition of non-CpG repeats in Alu and ribosomal RNAs by the Z-  
740 RNA binding domain of ADAR1 induces A-Z junctions. *Nature Communications* **12**,  
741 793 (2021).
- 742 28. Stellos, K. *et al.* Adenosine-to-inosine RNA editing controls cathepsin S expression in  
743 atherosclerosis by enabling HuR-mediated post-transcriptional regulation. *Nature*  
744 *medicine* **22**, 1140-1150 (2016).
- 745 29. Sun, T. *et al.* Decoupling expression and editing preferences of ADAR1 p150 and p110  
746 isoforms. *Proc Natl Acad Sci U S A* **118**(2021).
- 747 30. Sharpnack, M.F. *et al.* Global Transcriptome Analysis of RNA Abundance Regulation by  
748 ADAR in Lung Adenocarcinoma. *EBioMedicine* **27**, 167-175 (2018).
- 749 31. Fan, Z., Chen, X. & Chen, R. Transcriptome-wide analysis of TDP-43 binding small  
750 RNAs identifies miR-NID1 (miR-8485), a novel miRNA that represses NRXN1  
751 expression. *Genomics* **103**, 76-82 (2014).
- 752 32. Hussen, B.M., Azimi, T., Hidayat, H.J., Taheri, M. & Ghafouri-Fard, S. Long Non-  
753 coding RNA RMRP in the Pathogenesis of Human Disorders. *Front Cell Dev Biol* **9**,  
754 676588 (2021).
- 755 33. Ecco, G., Imbeault, M. & Trono, D. KRAB zinc finger proteins. *Development* **144**, 2719-  
756 2729 (2017).
- 757 34. Deletang, K. & Taulan-Cadars, M. Splicing mutations in the CFTR gene as therapeutic  
758 targets. *Gene Ther* **29**, 399-406 (2022).
- 759 35. Munro, D., Ghersi, D. & Singh, M. Two critical positions in zinc finger domains are  
760 heavily mutated in three human cancer types. *PLoS Comput Biol* **14**, e1006290 (2018).
- 761 36. Wang, G. & Vasquez, K.M. Impact of alternative DNA structures on DNA damage,  
762 DNA repair, and genetic instability. *DNA Repair (Amst)* **19**, 143-51 (2014).
- 763 37. Karczewski, K.J. *et al.* The mutational constraint spectrum quantified from variation in  
764 141,456 humans. *Nature* **581**, 434-443 (2020).
- 765 38. Morange, M. What history tells us IX. Z-DNA: when nature is not opportunistic. *J Biosci*  
766 **32**, 657-61 (2007).
- 767 39. Percharde, M., Bulut-Karslioglu, A. & Ramalho-Santos, M. Hypertranscription in  
768 Development, Stem Cells, and Regeneration. *Dev Cell* **40**, 9-21 (2017).
- 769 40. Cummings, B.B. *et al.* Transcript expression-aware annotation improves rare variant  
770 interpretation. *Nature* **581**, 452-458 (2020).
- 771 41. Wiktor-Brown, D.M., Hendricks, C.A., Olipitz, W. & Engelward, B.P. Age-dependent  
772 accumulation of recombinant cells in the mouse pancreas revealed by in situ fluorescence  
773 imaging. *Proc Natl Acad Sci U S A* **103**, 11862-7 (2006).
- 774 42. Herbert, A. The fat tail of obesity as told by the genome. *Curr Opin Clin Nutr Metab*  
775 *Care* **11**, 366-70 (2008).
- 776 43. Iuchi, S. Three classes of C2H2 zinc finger proteins. *Cell Mol Life Sci* **58**, 625-35 (2001).
- 777 44. De, P., Peak, M.M. & Rodgers, K.K. DNA cleavage activity of the V(D)J recombination  
778 protein RAG1 is autoregulated. *Mol Cell Biol* **24**, 6850-60 (2004).
- 779 45. Herbert, A. The four Rs of RNA-directed evolution. *Nature Genetics* **36**, 19-25 (2004).

- 780 46. Frietze, S., O'Geen, H., Blahnik, K.R., Jin, V.X. & Farnham, P.J. ZNF274 recruits the  
781 histone methyltransferase SETDB1 to the 3' ends of ZNF genes. *PLoS One* **5**, e15082  
782 (2010).
- 783 47. Valle-Garcia, D. *et al.* ATRX binds to atypical chromatin domains at the 3' exons of zinc  
784 finger genes to preserve H3K9me3 enrichment. *Epigenetics* **11**, 398-414 (2016).
- 785 48. Timpano, S. & Picketts, D.J. Neurodevelopmental Disorders Caused by Defective  
786 Chromatin Remodeling: Phenotypic Complexity Is Highlighted by a Review of ATRX  
787 Function. *Front Genet* **11**, 885 (2020).
- 788 49. Luco, R.F. *et al.* Regulation of alternative splicing by histone modifications. *Science* **327**,  
789 996-1000 (2010).
- 790 50. Ratnakumar, K. *et al.* ATRX-mediated chromatin association of histone variant  
791 macroH2A1 regulates alpha-globin expression. *Genes Dev* **26**, 433-8 (2012).
- 792 51. Truch, J. *et al.* The chromatin remodeller ATRX facilitates diverse nuclear processes, in a  
793 stochastic manner, in both heterochromatin and euchromatin. *Nat Commun* **13**, 3485  
794 (2022).
- 795 52. Thom, C.S., Dickson, C.F., Gell, D.A. & Weiss, M.J. Hemoglobin variants: biochemical  
796 properties and clinical correlates. *Cold Spring Harb Perspect Med* **3**, a011858 (2013).
- 797 53. Bryan, T.M., Englezou, A., Dalla-Pozza, L., Dunham, M.A. & Reddel, R.R. Evidence for  
798 an alternative mechanism for maintaining telomere length in human tumors and tumor-  
799 derived cell lines. *Nat Med* **3**, 1271-4 (1997).
- 800 54. Herbert, A. Simple Repeats as Building Blocks for Genetic Computers. *Trends Genet*  
801 (2020).
- 802 55. Herbert, A. ALU non-B-DNA conformations, flipons, binary codes and evolution. *Royal*  
803 *Society Open Science* **7**, 200222 (2020).
- 804 56. Herbert, A. The Simple Biology of Flipons and Condensates Enhances the Evolution of  
805 Complexity. *Molecules* **26**(2021).
- 806 57. Buniello, A. *et al.* The NHGRI-EBI GWAS Catalog of published genome-wide  
807 association studies, targeted arrays and summary statistics 2019. *Nucleic Acids Res* **47**,  
808 D1005-D1012 (2019).
- 809 58. Iseli, C. *et al.* Long-range heterogeneity at the 3' ends of human mRNAs. *Genome Res*  
810 **12**, 1068-74 (2002).
- 811 59. Wu, S., Yang, M., Kim, P. & Zhou, X. ADeditome provides the genomic landscape of A-  
812 to-I RNA editing in Alzheimer's disease. *Brief Bioinform* **22**(2021).
- 813 60. Lo Giudice, C., Tangaro, M.A., Pesole, G. & Picardi, E. Investigating RNA editing in  
814 deep transcriptome datasets with REDIttools and REDIportal. *Nat Protoc* **15**, 1098-1131  
815 (2020).
- 816 61. Hofacker, I.L. RNA secondary structure analysis using the Vienna RNA package. *Curr*  
817 *Protoc Bioinformatics* **Chapter 12**, Unit12 2 (2009).
- 818 62. Myers, T.A., Chanock, S.J. & Machiela, M.J. LDlinkR: An R Package for Rapidly  
819 Calculating Linkage Disequilibrium Statistics in Diverse Populations. *Front Genet* **11**,  
820 157 (2020).

821

822

823

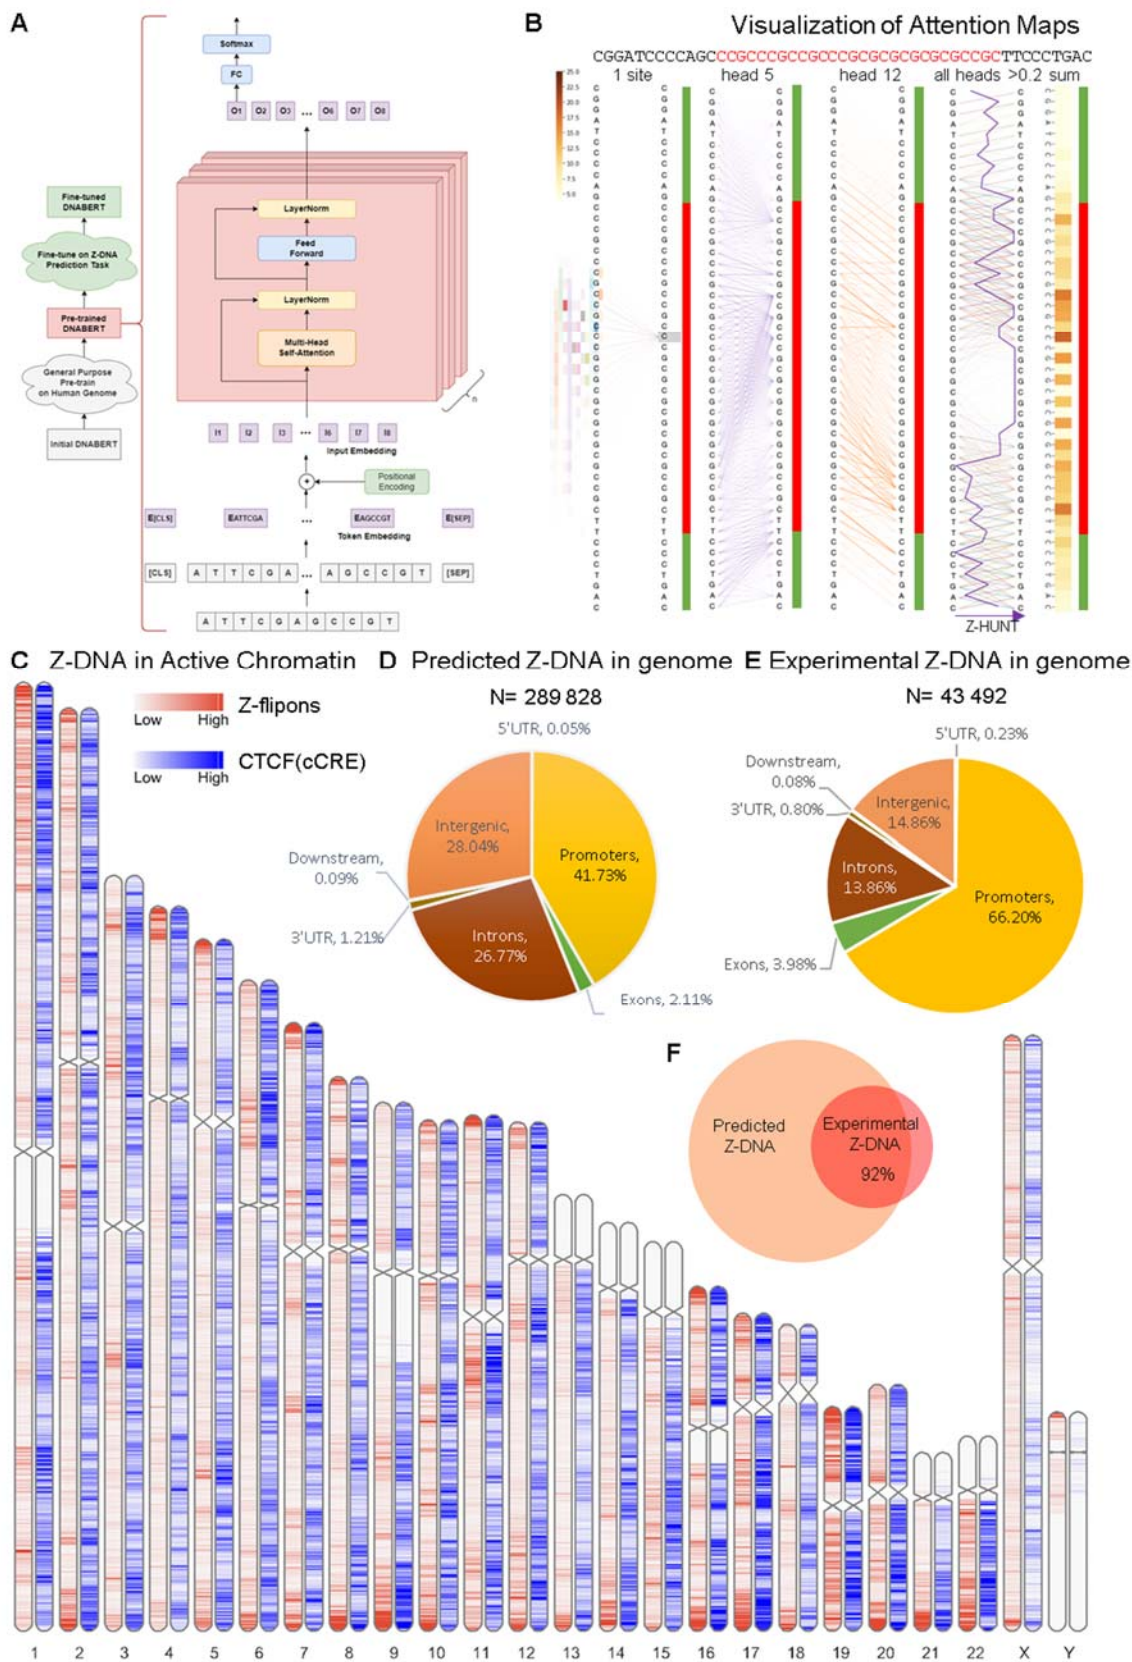

824  
825 **Figure 1.** Generation of whole-genome Z-flipon maps with the Z-DNABERT model. **A.**

826 Architecture of Z-DNABERT showing finetuning of DNABERT on experimental Z-DNA datasets.  
827 **B.** Interpretation of Z-DNABERT model. Visualization of attention scores for the sequence shown  
828 at the top of the panel that has the experimentally validated Z-DNA region colored red. From left  
829 to right: attention map for a single nucleotide; attention map from the head 5; attention map from  
830 head 12; attention map output that combines all layers with a threshold  $> 0.2$ ; a line showing Z-  
831 hunt3 scores across the sequence; heatmap summarizing Z-DNA propensity. **C.** Whole-genome  
832 map with predicted Z-flipons compared to a map of CTCF protein binding sites that are present  
833 in candidate cis-regulatory elements (cCRE) defined by the ENCODE consortium **D.** Genomic  
834 features of the predicted Z-flipons. **E.** Genomic features of the experimental Z-flipons. **F.** Venn  
835 diagram of the overlap between predicted and experimental Z-flipons.

836

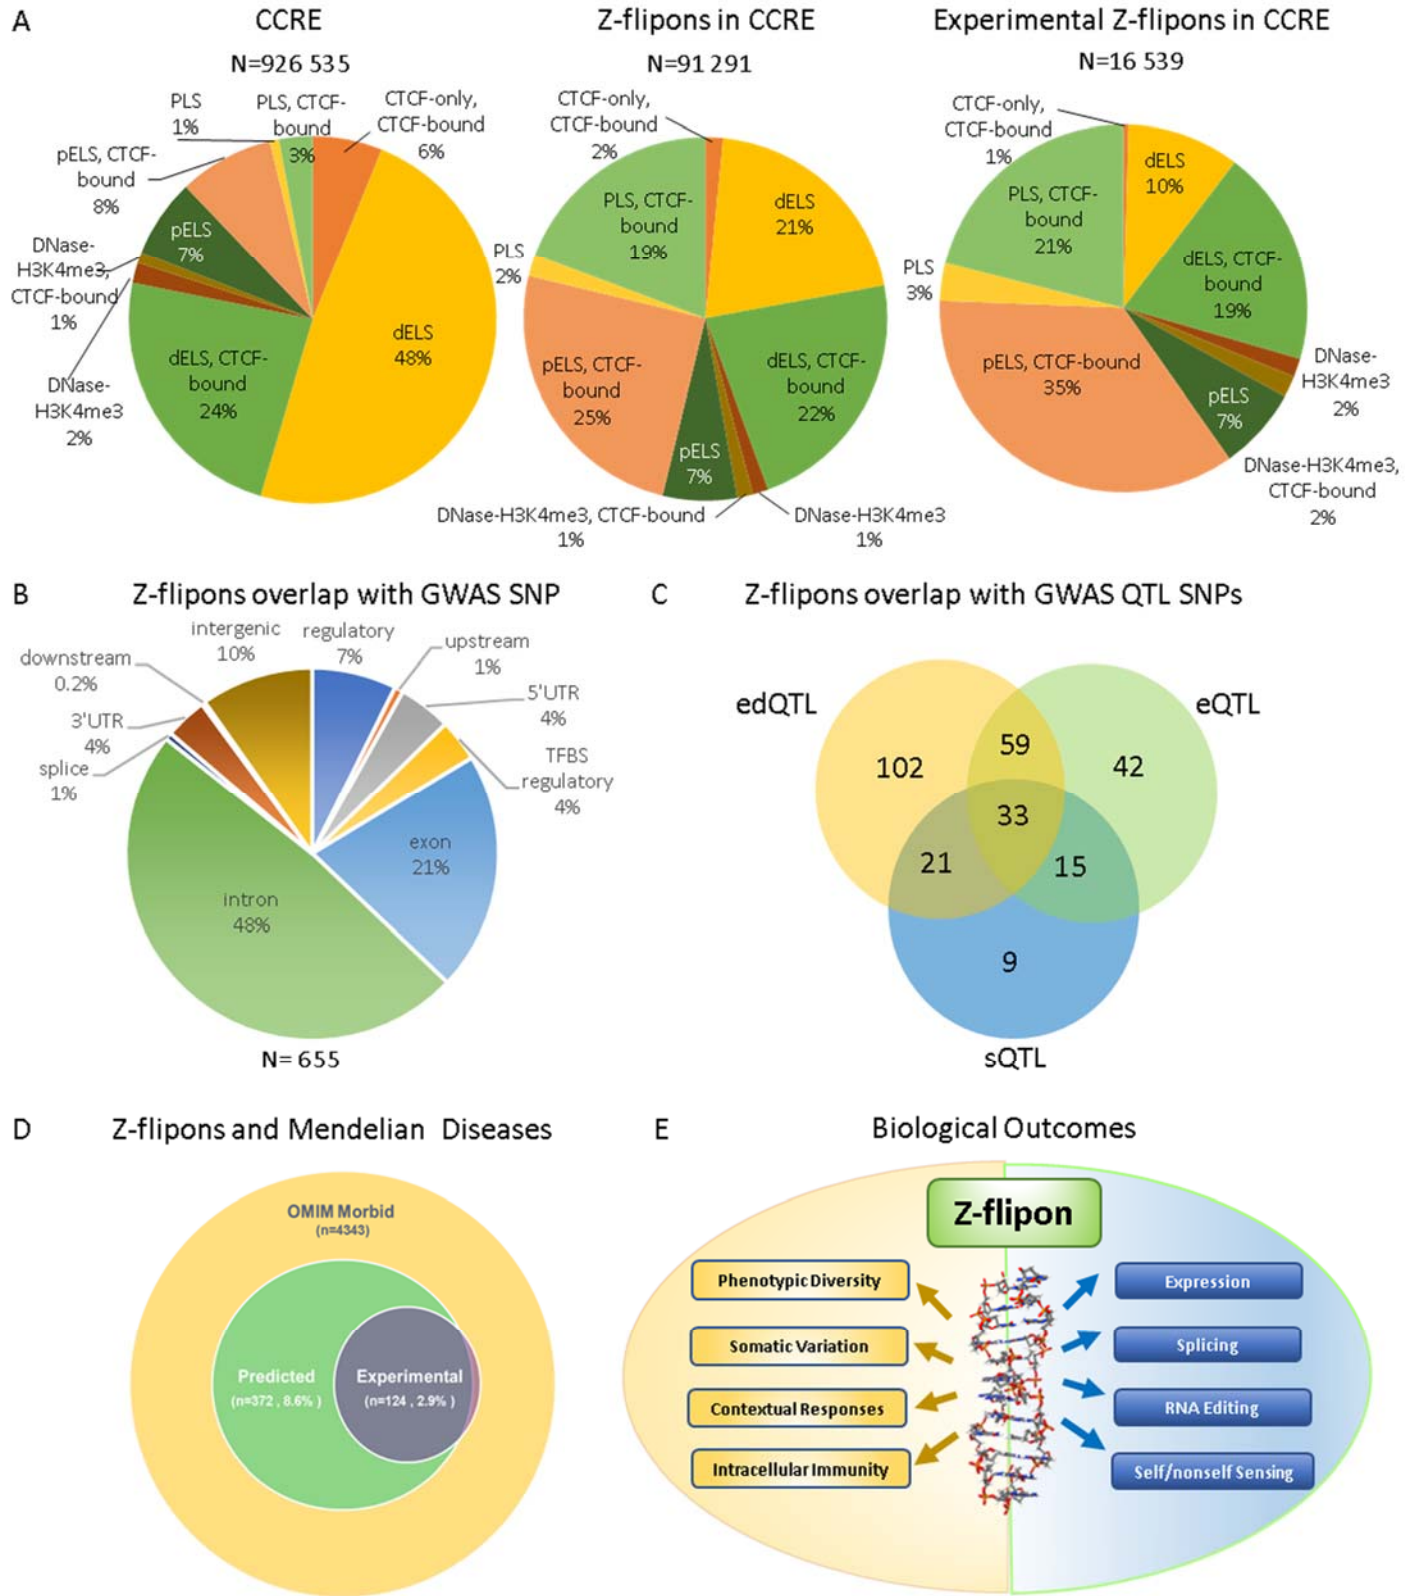

839 **Figure 2.** Z-flipon overlaps with orthogonal genomic data. **A.** Z-flipon overlaps with cCRE. **B.**Z-  
840 flipon overlaps with SNPs from the GWAS catalog. **C.** Predicted and experimental Z-flipon  
841 overlaps with GWAS QTL SNPs. **D.** Genes in the OMIM Morbid database with variants that  
842 overlap predicted and experimental Z-flipons. The predicted Z-flipon set captures 118 of the 124  
843 genes with variants overlapping experimentally validated -flipons. **E.** The many ways that Z-flipons  
844 impact phenotype.

845

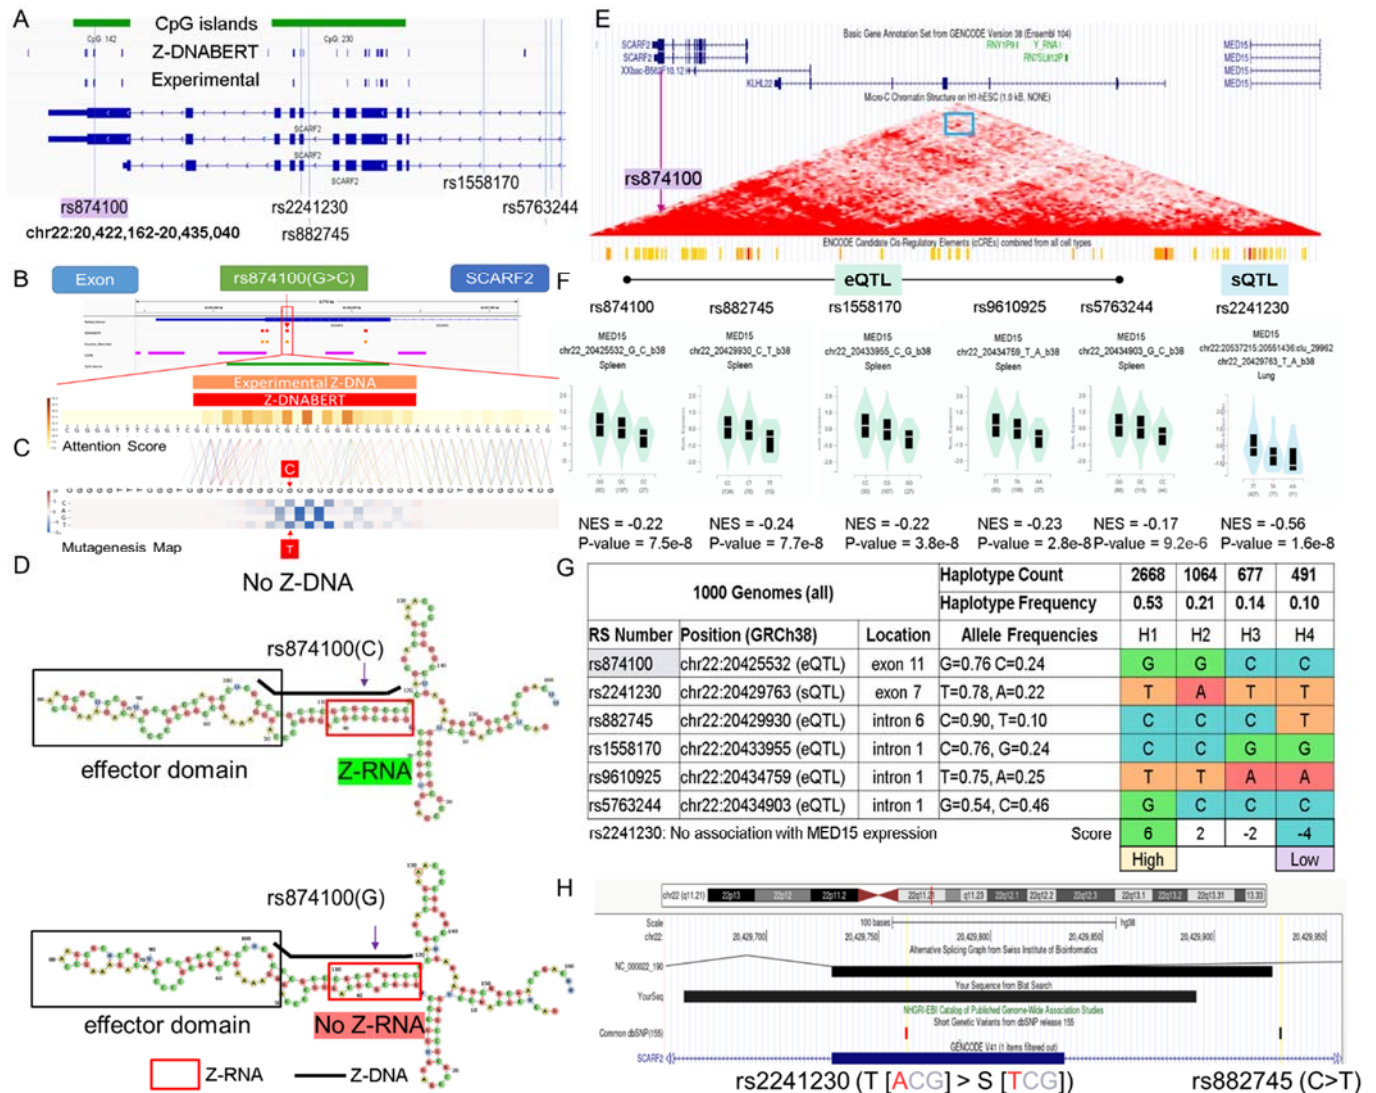

846  
847  
848  
849  
850  
851  
852  
853  
854  
855  
856  
857  
858  
859  
860  
861  
862

**Figure 3.** A Z-flipon in SCARF2 associates with MED15 expression **A.** chr22:20,422,162-20,435,040 showing the 3' region of SCARF2 along with SNPs used in the analysis. The position of predicted and experimentally confirmed Z-flipons are also shown, along with CpG islands. **B.** Overlap of eQTL rs874100 with Z-DNABERT Z-DNA prediction **C.** Computation prediction of the effect of mutagenesis of each nucleotide in the Z-flipon region. The SNP variant A allele leads to loss of Z-DNA formation. **D.** The Z-RNA fold with the Z-DNABERT Z-DNA sequence is shown below the thick black line. Note that the RNA is transcribed in the reverse direction from the genome. The SNP minor allele also disrupts the Z-RNA fold. **E.** chr22:20,415,440-20,518,466 showing both SCARF2 and MED15 genes, along with a microC map from human embryonic stem cells (HESC), with the blue box highlighting the convergence of the red diagonals that indicate contacts between rs874100 and the MED15 promoter. The orange bars show the cCRE in the MED15 promoter that were mapped by the ENCODE consortium. **F.** SNP eQTL for MED15 showing the normalized effect size (NES) and p-value determined by the GTEX consortium. **G.** The haplotypes were scored by adding +1 if a SNP allele was associated with an increase in trait value and -1 if the value was lower. Haplotype 1 favors Z-DNA formation and is associated with high MED15 expression while Haplotype 4 has low expression of MED15 and a low propensity to

863 form ZNAs. **H.** The rs2241230 SNP is positioned near an alternative splice site for SCARF2 and  
864 is a sQTL for MED15.

865



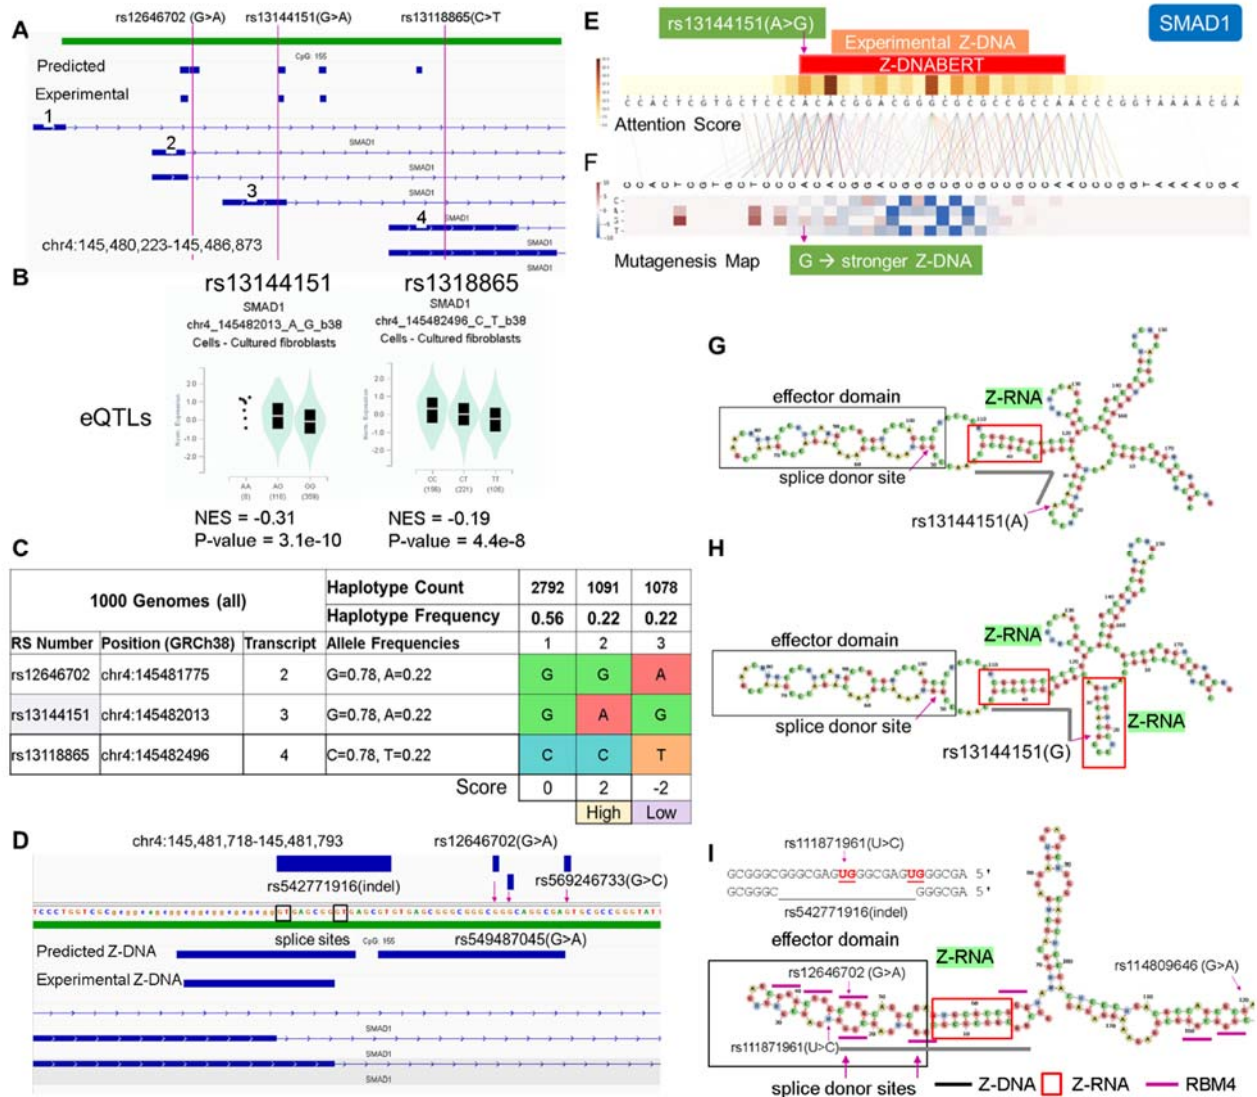

866

867 **Figure 4** SMAD1 expression and splicing for rs13144151(A>G) and rs12646702(G>A) **A**.  
 868 Location of SNPs and splicing isoforms. The exons that are labeled 2, 3 and 4 are associated  
 869 with different transcripts. After splicing, each transcript is uniquely marked by the presence or  
 870 absence of a particular SNP in one of the numbered exons. **B** The rs13144151(A>G) and the  
 871 rs13118865(C>T) SNPs affect expression of SMAD1 mRNA. No QTL data is available for  
 872 rs12646702, but it is in linkage disequilibrium with rs13118865 that serves as a surrogate. **C**.  
 873 Haplotypes differ in their expression of SMAD1. The haplotypes were scored by assigning +1 to  
 874 the alleles that increased trait values and -1 otherwise. For rs12646702 where no quantitative trait  
 875 information is available, both alleles were assigned a value of zero. **D**. The 5' UTR of SMAD1 in  
 876 the vicinity of rs1264670(G>A) showing the Z-DNABERT predicted Z-flipons, experimental Z-  
 877 flipons, SNPs and an alternatively spliced SMAD1 exon. **E**. Mapping at nucleotide resolution of  
 878 the overlap of Z-DNABERT predictions and rs13144151 **F**. Z-DNABERT predicted effects of  
 879 nucleotide substitutions at this locus showing that the A>G substitution enhances Z-DNA  
 880 formation. **G**. The Z-RNA stem and the effector domain loop containing a splice donor site formed  
 881 in the vicinity of rs1314415. The heavy black line corresponds to the Z-flipon sequence predicted  
 882 by Z-DNABERT. **H**. The rs1314415 G allele enables formation of an additional Z-RNA stem that

883 is associated with lower expression of the transcript. I. Z-RNA forming stem that includes  
884 rs12646702 is associated with an effector domain that contains CGGG binding sites for the  
885 alternative splicing factor RBM4 indicated by short purple lines , with the heavy black showing the  
886 Z-flipon sequence. The SNP locations are shown along with the rs542771916 indel.

887

888

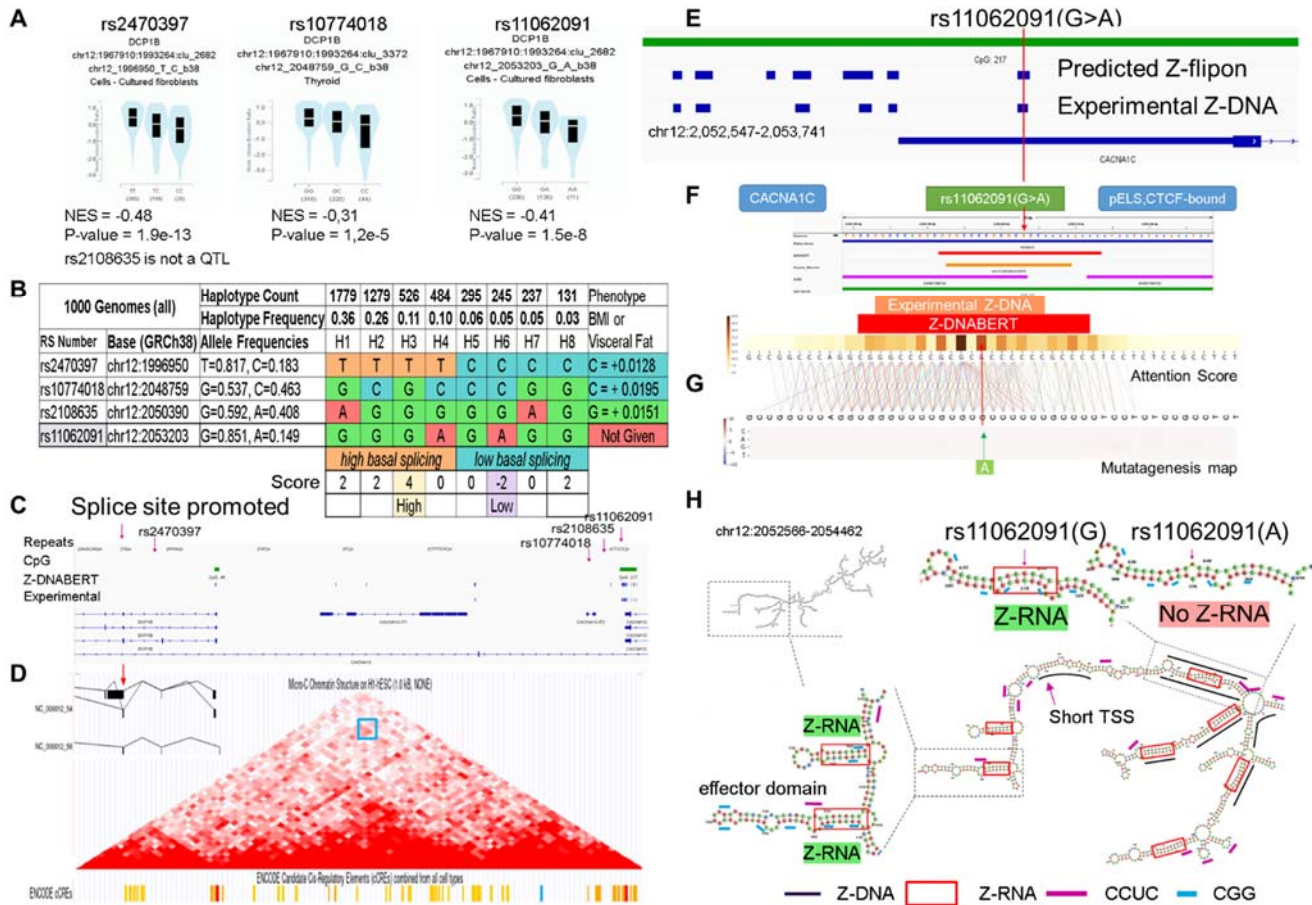

889

**Figure 5.** Z-flipons in (hg38.chr12:1,935,235-2,714,656) in CACNA1 (calcium voltage-gated channel subunit alpha1 C) affect splicing of DCP1B (decapping mRNA 1B) **A.** Minor SNP alleles are associated with decreased splicing of DCP1B transcripts **B.** Haplotype map of the region that supports an association between decreased DCP1B splicing and increased body mass index. The haplotypes were scored by adding +1 to the total if the allele was associated with an increase in trait value and -1 if the value was lower. The highest and lowest scores are associated with rs11062091 alleles. **C.** Location of the alternative DCP1B splice along with the position of all SNPs. **D.** The alternatively spliced DCP1B transcript is drawn as an inset to the microC map that shows contact is present between the SNP locus and the DCP1B genic region, as indicated by the region boxed in blue. The areas of contact contain chromatin modifications classified as cCRE by the ENCODE project (orange bars represent enhancers and red bars are for promoters). SNP positions, simple repeats and both predicted and experimental Z-DNA are shown. The CACNA1C splice site affected by rs11062091 is upstream (chr12:1967910-1993264) and is currently not annotated in GENCODE 41. **E.** Expanded view of Z-DNA in the vicinity of rs11062091 showing the overlap between the Z-DNABERT predicted and experimentally validated Z-flipon **F.** Z-DNABERT prediction for the Z-flipon that incorporates rs11062091. **G.** -DNABERT mutagenesis shows that single nucleotide variants do not affect the propensity of the rs11062091 Z-flipon to form Z-DNA. **H.** Progressively zoomed in views of the dsRNA fold of the transcript from the rs11062091 region. The A allele of rs11062091 disrupts formation of Z-RNA. The black lines show

909 the experimental determined regions of Z-DNA formation. Only the rs11062091 Z-flipon  
910 experimentally forms Z-DNA at the locations where the two RNA strands that create the Z-RNA  
911 stem are transcribed from. Multiple Z-RNA prone helices are formed with RNAs transcribed from  
912 regions where Z-DNA formation was not experimentally detected. The short purple lines show  
913 CCUC motifs that could represent CTCF protein binding sites. The RNA fold overlaps the  
914 transcription start site (TSS, chr12:2,052,986) for the shorter CACNA1C transcript as indicated  
915 by the TSS label. A Z-RNA stem/loop effector domain motif resembling those in Figures 3 and 4  
916 is also illustrated with short blue dashes above CGG repeat sequences.

917

918

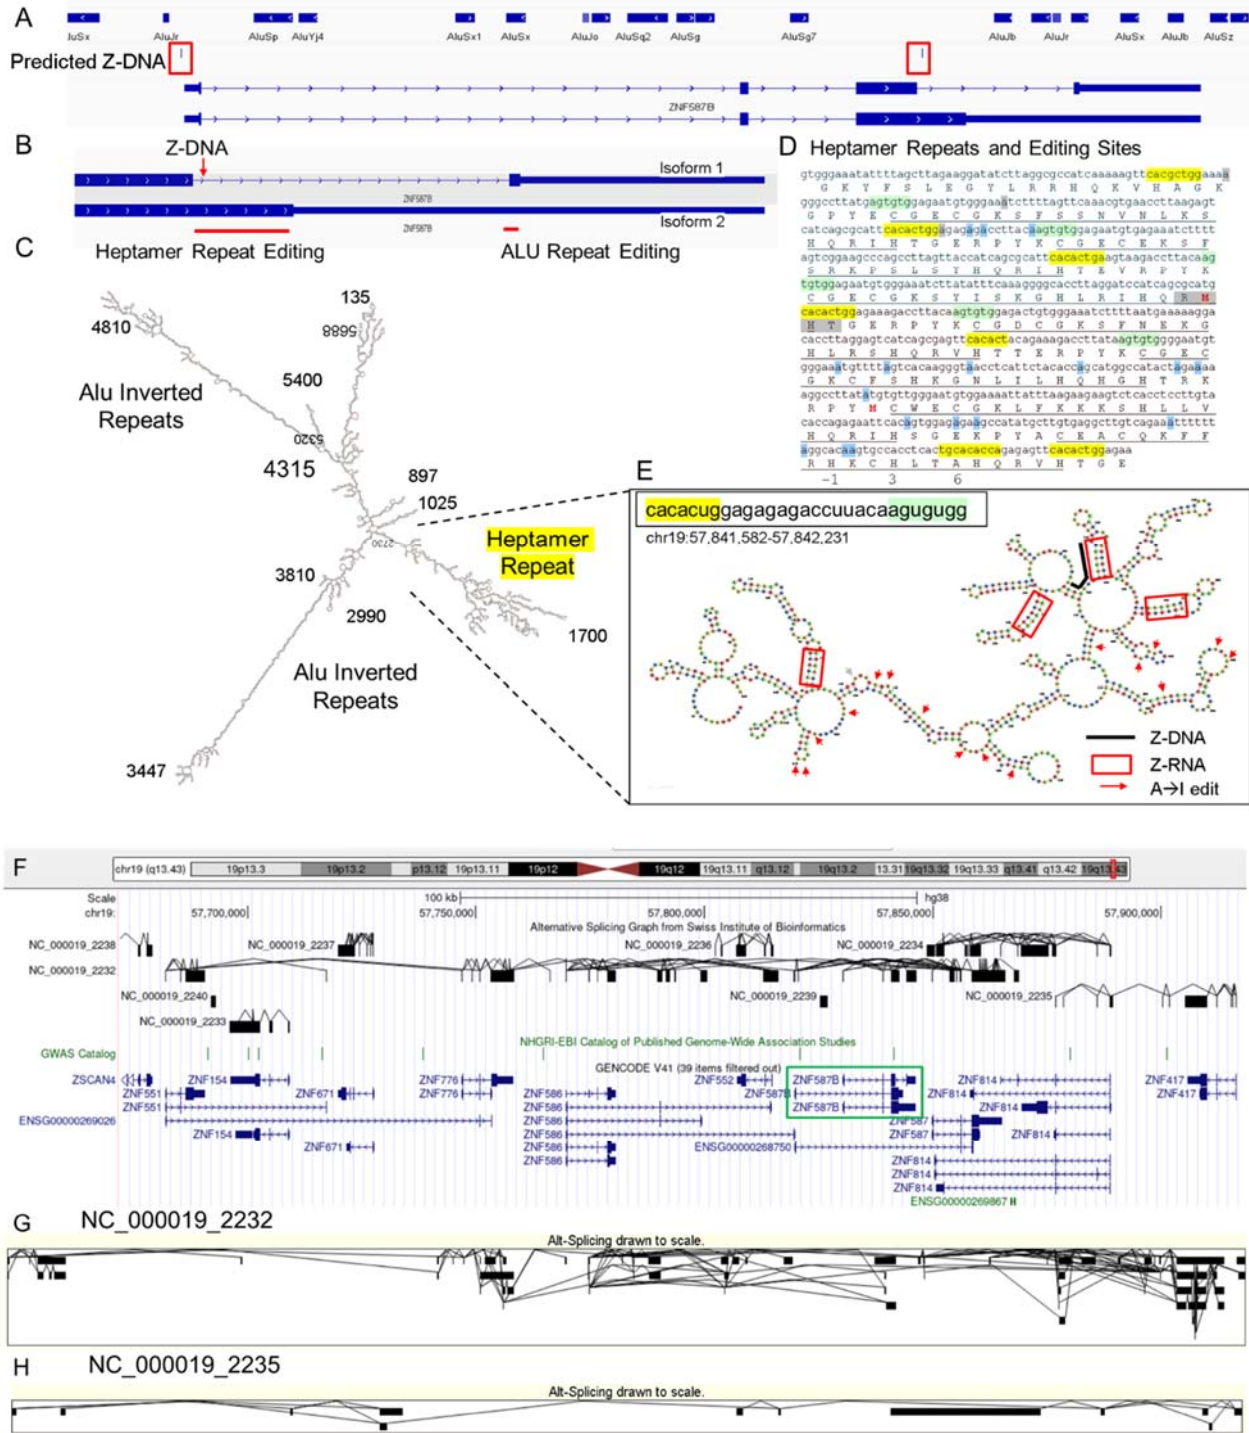

919

920

921 **Figure 6:** Nonsynonymous RNA editing of ZNF587B. **A** ZNF587B locus **B** ZNF597 isoform-  
 922 specific RNA edits occur in different exons. **C.** dsRNA fold showing two classes of editing  
 923 substrate **D.** dsRNA region maps to C2H2 Zinc Finger (ZNF) repeats that have a CX<sub>2-4</sub>CX<sub>12</sub>HX<sub>2-</sub>  
 924 <sub>6</sub>H motif (X is any amino acid) and are underlined. The ZNF domains are joined by a seven amino  
 925 acid linker that is within the heptad repeat. The gray box lies underneath the Z-DNABERT

926 predicted Z-DNA sequence and the blue boxes highlight residues with nonsynonymous edits. The  
927 numbering immediately below the sequence in panel D corresponds to the DNA binding residues  
928 of the  $\alpha$ -helix of the ZNF above. **E.** Heptad repeat folds are highlighted and the Z-RNA prone  
929 sequences are within the red boxes. The arrows indicate A→I editing sites. The heavy black line  
930 is above the predicted and experimentally validated Z-flipon sequence. **F.** Alternative splicing  
931 within chromosome 19 telomeric zinc finger gene cluster (hg38. chr19:57,672,145-57,921,020)  
932 with two of the trans-splicing isoforms displayed in **G** and **H**.
